# Supplementary material for: Synapsin E-domain is essential for α-synuclein function
Source: eLife journal article supplement (doi:10.7554/elife.89687), 2023-08-08

Western blot F2G

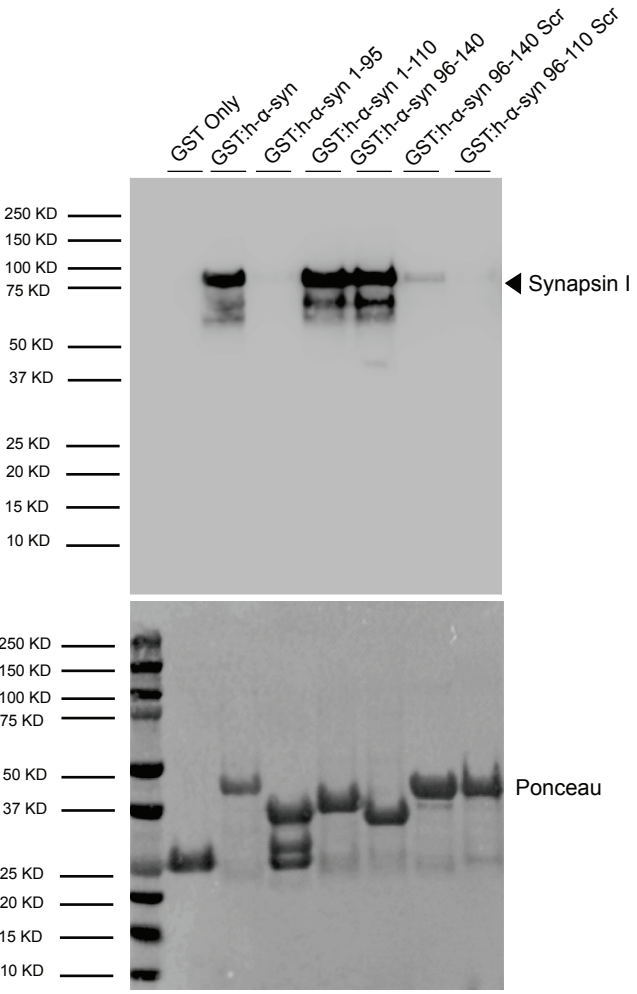

Supplement: fig2-data3 [file elife-89687-fig2-data3-v1.pdf]
