# Supplementary material for: Synapsin E-domain is essential for α-synuclein function
Source: eLife journal article supplement (doi:10.7554/elife.89687), 2023-08-08

Western blot F3D

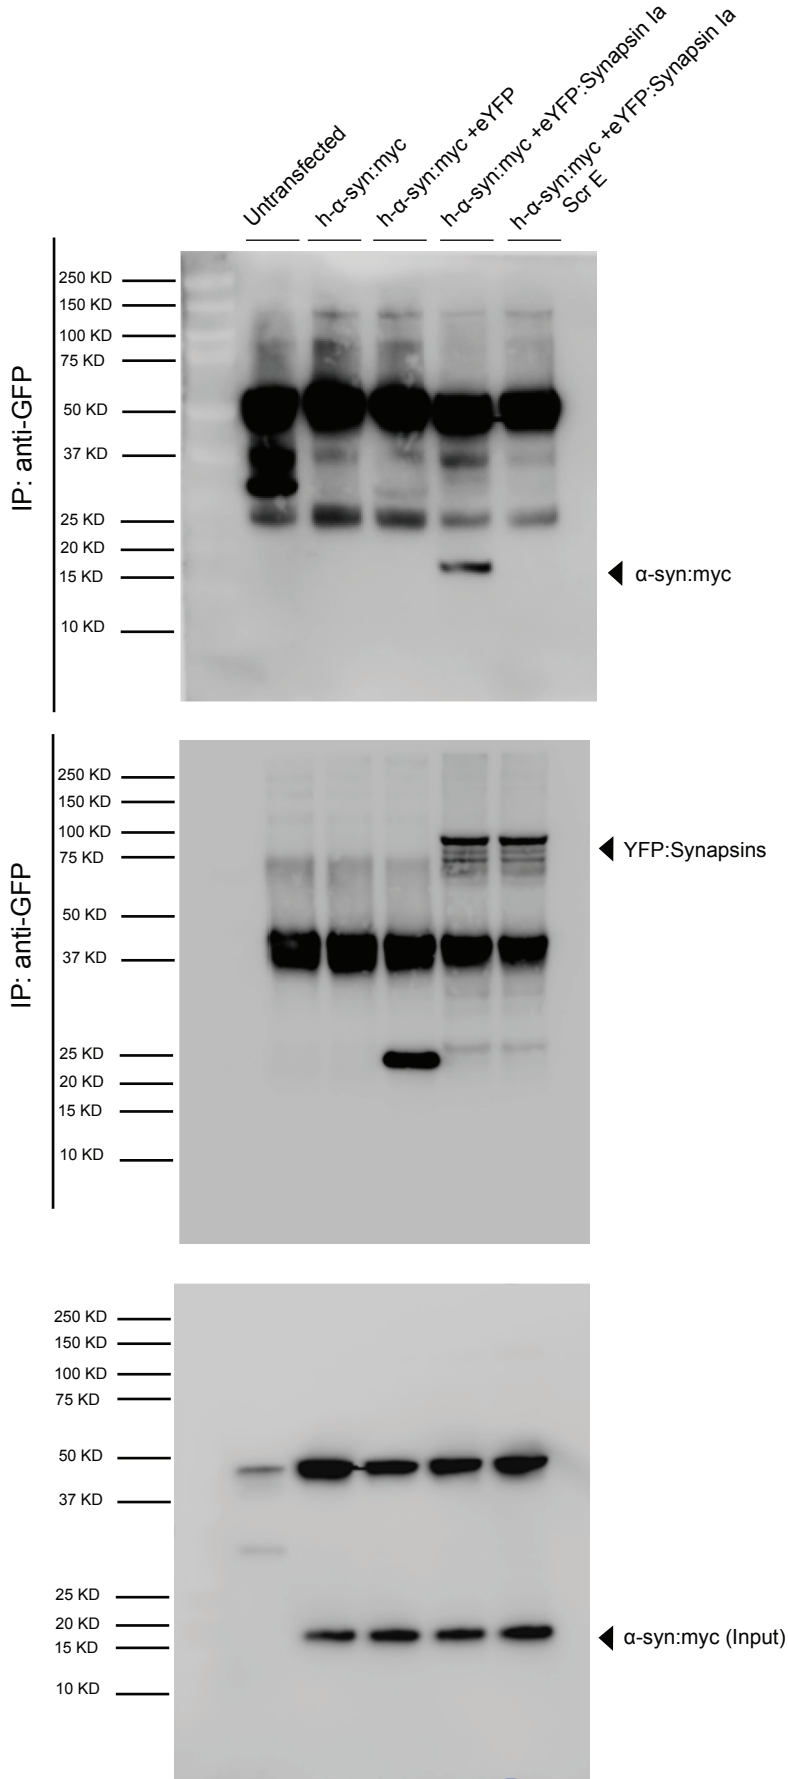

Supplement: fig3-data2 [file elife-89687-fig3-data2-v1.pdf]
