# Supplementary material for: Synapsin E-domain is essential for α-synuclein function
Source: eLife. 2024 May 7;12:RP89687. doi: 10.7554/eLife.89687 (PMC11076041; doi:10.7554/eLife.89687)
Supplement: Figure 1—figure supplement 1—source data 1. [file elife-89687-fig1-figsupp1-data1.xlsx]

## Sheet: Figure 1 Fig Suppl 1
Panel A	sypHy of WT, TKO and TKO+SynIa with Bafilomycin A						Units = DF/Fmax
Maximum-normalized and background-subtracted sypHy fluorescence as a function of time (in seconds). Field stimulation of a duration of 120 sec at 20Hz starts at t=0 (image #6).
WT																										WT+hasyn
Time																						N total	Mean	SE of mean		Time																						N total	Mean
-24.961	-0.00495	-0.02501	-0.00146	-0.01348	-0.03231	-0.01674	-0.01291	-0.01618	0.00185	0.01361	-0.0036	0.01921	-0.00795	-0.03302	0.000418643	-0.03419	-0.00215	-0.00877	0.00157	-0.01312	0.00574	21	-0.00873	0.00315		-24.961	-0.03151	-0.00516	-0.01212	-0.01947	-0.01491	-0.03503	0.01092	-0.01144	-0.01656	0.0519	0.07965	-0.00099064	-0.00919	0.00735	-0.03736	-0.00793	-0.01743	0.0109	-0.00855	-0.01066	-0.02989	21	-0.00512
-20	0.00251	0.000661346	0.00256	0.000430756	0.00859	-0.01007	0.00706	-0.02193	-0.01111	-0.01157	0.01013	0.00401	0.003	-0.02054	-0.00687	0.03049	-0.01191	-0.00428	-0.02307	0.0035	0.00975	21	-0.00184	0.00277		-20	0.00205	0.00327	-0.00158	-0.00927	0.00167	0.01988	0.05139	0.00401	0.01267	-0.04802	0.04669	0.04178	-0.01772	-0.00173	0.00865	-0.00294	-0.02056	-0.01551	0.00365	-0.00614	-0.00218	21	0.00334
-15	0.00609	0.00375	0.00198	0.00179	0.00591	0.01087	-0.01517	0.0013	0.01383	-0.01981	0.00295	-0.01361	9.38893e-05	0.02497	0.0046	-0.01721	0.01057	0.00817	-0.0199	-0.00361	-0.00595	21	7.72509e-05	0.00257		-15	0.000469734	-0.00682	0.01196	0.00283	0.0025	-0.00727	0.01437	0.01454	-0.000560111	-0.02159	-0.0154	-0.01056	0.04459	-0.03138	0.05611	0.03092	0.03823	-0.01795	-0.00939	0.01285	-0.00297	21	0.00502
-9.999	0.00238	0.01047	-0.00244	0.00483	0.01981	0.00791	-0.01332	0.00589	0.01218	0.01903	-0.01104	0.00776	0.01249	-0.01554	0.01814	0.00142	-0.00452	0.00259	0.01854	0.01809	-0.00437	21	0.00525	0.00238		-9.999	0.01504	0.00459	0.00448	0.01135	0.002	-0.0248	-0.03672	-0.00319	-0.01941	0.02767	-0.06316	0.00693	-0.04271	0.00313	-0.04406	-0.06871	-0.03862	0.01851	0.00117	-0.02066	-0.000282132	21	-0.01274
-4.999	-0.00602	0.01012	-0.000641837	0.00643	-0.0123	0.01681	0.02231	0.05074	0.00973	0.00388	-0.0044	-0.01058	-0.00832	0.03445	0.00223	0.03476	0.00812	0.00174	0.02153	0.00861	-0.02073	21	0.00802	0.00381		-4.999	0.01394	0.00412	-0.00274	0.01457	0.00875	0.01355	-0.01447	-0.01415	7.38341e-05	-0.04024	-0.00433	-0.06462	-0.00161	0.01524	-0.01948	0.01852	-0.00862	-0.00217	0.01509	-0.01425	0.01247	21	-0.00335
0	-0.00222	0.00762	0.0058	0.00534	0.01029	-0.00878	0.01203	-0.01981	-0.02647	-0.00513	0.00596	-0.0068	0.000681731	0.00968	-0.01853	-0.01527	-0.000114095	0.000541478	0.00133	-0.01347	0.01556	21	-0.00199	0.00252		0	0.02356	0.02201	0.00918	0.01031	0.00288	0.03366	-0.02549	0.01022	0.0238	0.03028	-0.04346	0.02745	0.02664	0.00739	0.03614	0.03014	0.04702	0.00622	-0.00197	0.03886	0.02285	21	0.01608
5.201	0.14882	0.18761	0.14258	0.12575	0.08929	0.1509	0.15811	0.20634	0.10416	0.11429	0.12404	0.08721	0.19471	0.15809	0.09245	0.12319	0.10249	0.09728	0.09222	0.10319	0.10264	21	0.12883	0.00794		5.201	0.15262	0.16014	0.14032	0.19201	0.11594	0.12394	0.08601	0.0814	0.10716	0.09415	0.04125	0.08355	0.05115	0.10582	0.07191	0.08969	0.02352	0.08365	0.06772	0.09067	0.03403	21	0.09508
10.2	0.24178	0.26063	0.23744	0.20436	0.1994	0.2432	0.25601	0.34355	0.19061	0.19532	0.21437	0.23458	0.32707	0.20152	0.21156	0.26103	0.17799	0.19732	0.15934	0.22426	0.18546	21	0.22699	0.00995		10.2	0.22853	0.24508	0.23027	0.28826	0.214	0.15655	0.06655	0.15126	0.23686	0.10638	0.10863	0.12725	0.0682	0.17888	0.07057	0.14986	0.08129	0.12595	0.1591	0.11264	0.0993	21	0.15264
15.201	0.28191	0.28323	0.29448	0.20067	0.30388	0.30366	0.40663	0.47259	0.23039	0.26883	0.26379	0.29863	0.39928	0.28709	0.31891	0.38474	0.26572	0.2748	0.18552	0.29915	0.24238	21	0.29839	0.015		15.201	0.26761	0.3018	0.29331	0.33061	0.28094	0.21686	0.09547	0.2118	0.32065	0.14178		0.18114	0.15314	0.25736	0.07939	0.16799	0.09785	0.15744	0.17086	0.1733	0.12172	20	0.20105
20.201	0.30016	0.30487	0.32827	0.27306	0.37283	0.35523	0.41017	0.51173	0.3107	0.33066	0.31127	0.37469	0.45034	0.37679	0.38037	0.46751	0.32179	0.33231	0.26728	0.34237	0.33462	21	0.3551	0.01367		20.201	0.31475	0.36919	0.33324	0.36406	0.30999	0.28153	0.1513	0.27335	0.36265	0.21486		0.27581	0.20183	0.2889	0.13202	0.24467	0.22291	0.17866	0.2255	0.16748	0.13638	20	0.25245
25.2	0.30159	0.3091	0.34587	0.29182	0.38491	0.39145	0.49144	0.58399	0.35225	0.38284	0.35807	0.43561	0.50465	0.45664	0.43427	0.44759	0.38314	0.35954	0.27668	0.37468	0.37531	21	0.39245	0.01658		25.2	0.3257	0.3794	0.3658	0.38345	0.34985	0.34136	0.08603	0.30312	0.38393	0.28042	0.17668	0.3516	0.22855	0.37715	0.20433	0.24037	0.1914	0.22693	0.26053	0.24064	0.13574	21	0.27776
30.2	0.32195	0.32303	0.36773	0.31697	0.43286	0.44086	0.48475	0.61502	0.39471	0.40953	0.38379	0.44689	0.53222	0.47883	0.43325	0.48856	0.42087	0.39049	0.28313	0.40949	0.39818	21	0.41777	0.01683		30.2	0.34367	0.4112	0.37612	0.3944	0.36648	0.28091	0.11438	0.349	0.4124	0.25743	0.17813	0.39931	0.19193	0.37563	0.20208	0.35284	0.15395	0.23671	0.27579	0.21596	0.13972	21	0.28705
35.2	0.32116	0.33351	0.37163	0.33137	0.42866	0.4697	0.52785	0.6186	0.44554	0.44108	0.44109	0.48602	0.53899	0.50762	0.49451	0.49702	0.44751	0.41597	0.30603	0.4091	0.43825	21	0.44149	0.01724		35.2	0.34632	0.40555	0.40282	0.41316	0.38256	0.34694	0.11856	0.37563	0.46398	0.27868	0.2066	0.3998	0.20315	0.4018	0.25031	0.33371	0.25259	0.22036	0.29302	0.2864	0.13702	21	0.31043
40.2	0.33078	0.34416	0.36943	0.34297	0.48818	0.48675	0.61222	0.63646	0.44695	0.49809	0.45708	0.52113	0.53874	0.50961	0.52666	0.53059	0.46192	0.43607	0.27578	0.4394	0.44709	21	0.46191	0.0199		40.2	0.35133	0.4318	0.41273	0.40495	0.39901	0.28228	0.11167	0.4521	0.42775	0.32054	0.22707	0.38954	0.24333	0.52833	0.20489	0.29652	0.20177	0.25452	0.32035	0.29016	0.16871	21	0.31997
45.201	0.35035	0.35129	0.3859	0.35721	0.48327	0.50857	0.57713	0.63431	0.46194	0.5262	0.47547	0.51532	0.56375	0.52385	0.55201	0.50946	0.46556	0.4453	0.29248	0.44751	0.49832	21	0.47263	0.0187		45.201	0.35253	0.42511	0.41995	0.41037	0.40027	0.36589	0.13842	0.42418	0.46713	0.26138	0.18499	0.54037	0.24838	0.49739		0.34586	0.20833	0.2443	0.30407	0.32247	0.13924	20	0.33503
50.201	0.34948	0.35761	0.38456	0.36424	0.5303	0.50655	0.61769	0.67423	0.52065	0.55017	0.51037	0.52998	0.57935	0.54269	0.57803	0.51992	0.48174	0.44441	0.34176	0.46698	0.49016	21	0.49242	0.01993		50.201	0.35436	0.43973	0.44686	0.41776	0.41082	0.3739	0.08786	0.47937	0.47839	0.26634	0.22409	0.50102	0.29786	0.52179		0.35108	0.19241	0.24179	0.32606	0.31711	0.14199	20	0.34353
55.2	0.34942	0.36735	0.38441	0.38101	0.56007	0.57024	0.6302	0.67129	0.52787	0.52253	0.52634	0.54651	0.60529	0.56389	0.58005	0.51161	0.4771	0.48015	0.40783	0.4859	0.50487	21	0.50733	0.01933		55.2	0.34144	0.4331	0.45277	0.43911	0.43279	0.39889	0.05897	0.46595	0.49299	0.32186	0.24413	0.48059	0.29128	0.54961		0.41018	0.1936	0.27604	0.34797	0.32202	0.17566	20	0.35645
60.2	0.35916	0.36883	0.39939	0.38797	0.55602	0.55738	0.65375	0.68782	0.51199	0.56149	0.52911	0.55148	0.63114	0.56395	0.58862	0.55072	0.48551	0.47352	0.34617	0.46953	0.52599	21	0.51236	0.02111		60.2	0.35072	0.4444	0.46493	0.43516	0.42382	0.3527	0.13358	0.50495	0.4832	0.33008	0.18462	0.48893	0.31931	0.55688		0.38905	0.32331	0.26947	0.33954	0.32981	0.18081	20	0.36526
65.199	0.3577	0.38886	0.39995	0.4056	0.56083	0.54274	0.64046	0.70403	0.54786	0.58613	0.56039	0.53659	0.59016	0.57793	0.61778	0.58439	0.51946	0.49358	0.35245	0.49172	0.52788	21	0.52317	0.02071		65.199	0.36944	0.45835	0.47609	0.44756	0.42708	0.37827	0.10935	0.49552	0.49506	0.30298	0.24898	0.58153	0.32486	0.61101	0.21087	0.41529	0.27229	0.2658	0.34468	0.34829	0.20535	21	0.37089
70.199	0.36074	0.39276	0.39931	0.41538	0.54022	0.57398	0.67533	0.70868	0.5574	0.59254	0.57976	0.55269	0.59611	0.57047	0.61687	0.60317	0.51207	0.51344	0.40832	0.49767	0.54521	21	0.53391	0.02045		70.199	0.36685	0.44757	0.47887	0.44274	0.43149	0.37166	0.13649	0.51659	0.51271	0.26597	0.27094	0.51373	0.23709	0.59552	0.19584	0.38716	0.31152	0.30496	0.3678	0.39637	0.18763	21	0.36855
75.199	0.3648	0.39531	0.40753	0.42186	0.56544	0.58832	0.68988	0.65732	0.55268	0.5715	0.60656	0.57284	0.61882	0.58431	0.64427	0.6341	0.52308	0.51122	0.41414	0.52653	0.57021	21	0.54384	0.02039		75.199	0.37413	0.4574	0.49301	0.43862	0.43908	0.4291	0.19843	0.5172	0.52569	0.38303	0.25525	0.5734	0.28672	0.57971	0.22437	0.3855	0.26975	0.32927	0.37433	0.42397	0.20762	21	0.38884
80.2	0.37892	0.40808	0.409	0.43233	0.58237	0.59208	0.69052	0.68389	0.59885	0.59674	0.58852	0.57715	0.62613	0.60913	0.64548	0.61076	0.54154	0.532	0.38177	0.53625	0.57425	21	0.55218	0.02081		80.2	0.36529	0.46328	0.50193	0.45371	0.43171	0.40937	0.07958	0.5342	0.52492	0.28194	0.28448	0.4905	0.26788	0.58985	0.21512	0.40705	0.29632	0.35573	0.378	0.3807	0.22685	21	0.37802
85.203	0.38266	0.41829	0.41285	0.44592	0.59309	0.61984	0.67626	0.74101	0.56544	0.6039	0.59094	0.61859	0.61962	0.59897	0.64879	0.61623	0.55795	0.54552	0.46603	0.54126	0.58647	21	0.56427	0.02008		85.203	0.36572	0.46212	0.50004	0.46226	0.44784	0.39962	0.20307	0.55029	0.54808	0.28648	0.29351	0.45439	0.3889	0.60101	0.23823	0.40126	0.26177	0.31487	0.37792	0.40595	0.19195	21	0.38835
90.199	0.37573	0.42167	0.41886	0.44216	0.59933	0.6188	0.68155	0.72201	0.57223	0.60729	0.60651	0.60194	0.61014	0.59667	0.65968	0.63763	0.55843	0.54762	0.46719	0.537	0.5996	21	0.56581	0.02007		90.199	0.37067	0.47484	0.50427	0.4605	0.45606	0.40613	0.19563	0.55396	0.54281	0.2677	0.3013	0.5246	0.3724	0.62273	0.23077	0.38379	0.29746	0.32828	0.39007	0.41971	0.20915	21	0.39585
95.2	0.38204	0.43491	0.4146	0.45417	0.60556	0.61776	0.68684	0.70301	0.57901	0.61068	0.62208	0.58529	0.60066	0.59436	0.67056	0.65903	0.55891	0.54971	0.46834	0.53274	0.61272	21	0.56871	0.01978		95.2	0.35425	0.47851	0.49373	0.47754	0.46141	0.41263	0.18819	0.55762	0.53754	0.24891	0.30908	0.5948	0.3559	0.64444	0.2233	0.36631	0.33315	0.34169	0.40222	0.43347	0.22635	21	0.40195
100.2	0.3648	0.42979	0.42963	0.46432	0.6098	0.64373	0.75696	0.67095	0.62191	0.59695	0.63701	0.61113	0.61331	0.59792	0.67867	0.67217	0.59838	0.56251	0.49171	0.54535	0.60478	21	0.58104	0.02102		100.2	0.32862	0.47026	0.50438	0.46758	0.45838	0.38751	0.16901	0.57617	0.56486	0.25783	0.29729	0.53809	0.36447	0.59899	0.24944	0.32087	0.29654	0.32872	0.40543	0.45561	0.2467	21	0.39461
105.2	0.36796	0.42658	0.43747	0.4596	0.61506	0.63985	0.75595	0.69277	0.6225	0.61559	0.63642	0.60778	0.62677	0.61508	0.67123	0.66028	0.60209	0.58093	0.48444	0.55959	0.61892	21	0.58556	0.02115		105.2	0.31789	0.47706	0.507	0.46308	0.46846	0.41874	0.18703	0.5701	0.56823	0.25856	0.28834	0.54449	0.33695	0.60173	0.29204	0.35123	0.29951	0.33447	0.41408	0.44052	0.22999	21	0.39855
110.199	0.36484	0.41391	0.42884	0.46912	0.62032	0.63597	0.75494	0.71459	0.62309	0.63422	0.63583	0.60442	0.64023	0.63223	0.66379	0.64839	0.6058	0.59934	0.47717	0.57383	0.63306	21	0.58923	0.02192		110.199	0.30184	0.4458	0.48967	0.46689	0.46052	0.44997	0.20504	0.56402	0.5716	0.25928	0.27938	0.55089	0.30943	0.60447	0.33463	0.38159	0.30247	0.34022	0.42272	0.42542	0.21327	21	0.39901
115.199	0.37933	0.39826	0.43604	0.48909	0.62056	0.64531	0.76836	0.68269	0.63119	0.624	0.65606	0.59234	0.6325	0.6044	0.66524	0.64952	0.59848	0.61067	0.47463	0.57702	0.63891	21	0.58927	0.0215		115.199	0.31357	0.40463	0.45779	0.43884	0.45087	0.4503	0.19541	0.56536	0.57378	0.25498	0.25889	0.51241	0.32341	0.63769	0.30257	0.39645	0.31445	0.33839	0.4216	0.46315	0.22951	21	0.39543
120.198	0.36568	0.39154	0.44973	0.49128	0.6208	0.65465	0.78177	0.65078	0.63928	0.61378	0.67629	0.58026	0.62477	0.57656	0.66669	0.65065	0.59115	0.622	0.47209	0.5802	0.64475	21	0.58784	0.02205		120.198	0.29604	0.37	0.42295	0.41699	0.42809	0.45062	0.18577	0.5667	0.57595	0.25067	0.23839	0.47392	0.33738	0.67091	0.2705	0.4113	0.32642	0.33655	0.42047	0.50088	0.24574	21	0.3903
125.199	0.36553	0.37511	0.43934	0.49236	0.62068	0.64998	0.77506	0.66673	0.63523	0.61889	0.66618	0.5863	0.62864	0.59048	0.66597	0.65009	0.59481	0.61634	0.47336	0.57861	0.64183	21	0.58721	0.02236		125.199	0.2853	0.34891	0.38466	0.39422	0.40803	0.45046	0.19059	0.56603	0.57486	0.25282	0.24864	0.49316	0.33039	0.6543	0.28653	0.40387	0.32043	0.33747	0.42103	0.48202	0.23762	21	0.38435
NH4Cl																										NH4Cl
179.702	1.01738	0.95805	0.98386	0.98984	0.86587	1.00788	0.97899	1.12867	0.96017	1.0112	0.99278	0.97832	1.01289	0.98873	1.00615	0.92862	0.98189	1.01518	0.97003	0.98307	0.98663	21	0.98791	0.01023		179.702	0.97383	0.99879	0.98514	1.00901	0.96403	0.93212	0.9252	0.9957	1.00508	1.00866	1.01249	0.99748	0.96944	0.98369	1.00123	0.9504	0.91373	1.00833	0.97743	0.98073	0.98387	21	0.97983
184.447	1.01411	1.00404	1.01478	1.03735	1.01207	1.00819	1.01594	1.04342	0.99657	1.02008	1.01996	1.01746	1.02175	0.97959	1.00869	1.04108	0.9958	1.03678	1.0292	1.00896	1.03029	21	1.01696	0.0035		184.447	1.03378	1.02275	1.02524	1.04935	1.02299	1.04035	1.03171	0.99666	1.04314	1.05642	1.04829	1.00723	1.03899	1.00523	1.0556	0.98789	0.96971	0.99479	1.01666	0.98586	1.03691	21	1.02236
189.446	1.00522	1.01111	1.0016	1.02775	1.05296	1.02347	0.99229	1.02326	0.97033	0.99624	1.00893	1.02817	0.9856	1.01691	1.00463	1.00568	1.029	0.98297	0.99801	1.0121	1.01318	21	1.00902	0.00406		189.446	1.01293	1.01225	1.01664	1.02108	1.01753	1.00432	1.0178	1.02653	0.99958	0.9552	1.02295	0.95363	0.99606	1.01385	0.97937	0.96489	1.0132	0.99659	1.00079	0.99343	1.00199	21	1.00098
194.447	0.994	1.01767	0.99899	1.00286	1.02971	0.99613	0.97711	0.95945	1.00675	0.99858	1.00296	1.0116	1.00863	1.00716	1.01856	0.96635	0.99562	1.00038	1.02081	1.00398	1.00948	21	1.00128	0.0037		194.447	1.01438	1.00543	1.00248	1.00414	1.01396	1.01591	0.97701	1.01226	0.96853	0.96852	0.93512	1.00449	0.98896	1.02083	0.90031	0.99076	0.99273	1.01468	1.01183	1.00052	1.01376	21	0.99317
199.447	0.99331	1.00828	0.99953	0.98052	1.04236	0.98001	0.99037	0.93114	0.99202	0.97997	0.98316	0.97131	0.97857	0.97263	0.96634	1.03187	0.991	0.98094	1.00062	0.99582	0.97698	21	0.98794	0.00497		199.447	1.00146	0.97342	0.99448	0.97042	0.99542	1.00924	1.0214	0.99544	0.97957	0.99703	0.99215	1.02249	0.95469	0.99303	0.9873	1.04095	1.01967	0.99297	0.99375	1.04839	0.99042	21	0.99875
204.446	0.97598	1.00085	1.00123	0.96169	0.99702	0.98432	1.04531	0.91406	1.07416	0.99393	0.99221	0.99314	0.99256	1.03498	0.99564	1.02638	1.0067	0.98374	0.98132	0.99608	0.98345	21	0.99689	0.00692		204.446	0.96362	0.98736	0.97603	0.94599	0.98607	0.99807	1.02689	0.97341	1.00411	1.01417	0.989	1.01468	1.05186	0.98337	1.07619	1.06511	1.09096	0.99264	0.99953	0.99107	0.97305	21	1.00491
Note: Blue data points were linearly interpolated from adjacent points due to differences in an earlier acquisition protocol
Note: Empty cells represent missing data due to technical failure in acquisition equipment
Panel B
Plateau (average of t=115-125sec in panel a, images #29-31)					Units = DF/Fmax
										Shapiro-Wilk Normality Test								Mann-Whitney U-test			WT vs WT+hasyn					Two sample t Test			TKO vs TKO+hasyn					Two sample t Test			TKO+SynIa vs TKO+SynIa+hasyn
WT	WT+hasyn		TKO	TKO+hasyn		TKO+SynIa	TKO+SynIa+hasyn				DF	Statistic	p-value	Decision at level(5%)				Mann-Whitney Test (26/11/2023 13:31:47)								Two sample t Test (26/11/2023 13:32:04)								Two sample t Test (31/10/2023 12:44:52)
0.37018	0.2983		0.41637	0.54077		0.58841	0.48269			WT	21	0.89202	0.02458	Reject normality				Descriptive Statistics								Descriptive Statistics								Descriptive Statistics
0.3883	0.37451		0.5445	0.50894		0.40737	0.25948			WT+hasyn	21	0.97285	0.79488	Can't reject normality					N	Min	Q1	Median	Q3	Max				N	Mean	SD	SEM	Median				N	Mean	SD	SEM	Median
0.44171	0.4218		0.43665	0.50199		0.62785	0.58798			tagBFP	16	0.97887	0.954	Can't reject normality				WT	21	0.37018	0.53476	0.61889	0.65003	0.77506		tagBFP		16	0.52132	0.06524	0.01631	0.52657		SynIa		9	0.54169	0.06563	0.02188	0.53201
0.49091	0.41668		0.53427	0.5894		0.53201	0.43751			tagBFP+hasyn	11	0.91894	0.3099	Can't reject normality				WT+hasyn	21	0.19059	0.29242	0.40387	0.46624	0.6543		tagBFP+hasyn		11	0.54843	0.03849	0.01161	0.54267		SynIa+hasyn		9	0.42572	0.09337	0.03112	0.43751
0.62068	0.42899		0.55578	0.57164		0.57128	0.31853			SynIa	9	0.94028	0.58481	Can't reject normality				Ranks									Difference		-0.02711		0.02197				Difference	9	0.11597		0.03804	0.0945
0.64998	0.45046		0.61748	0.59259		0.52869	0.44116			SynIa+hasyn	9	0.91634	0.36276	Can't reject normality					N	Mean Rank	Sum Rank						Overall	27	0.53236	0.05665	0.0109	0.54077			Overall	18	0.4837	0.09843	0.0232	0.49254
0.77506	0.19059		0.50246	0.57005		0.51644	0.43638											WT	21	29.6191	622					t-Test Statistics								t-Test Statistics
0.66673	0.56603		0.45342	0.60014		0.50239	0.41941											WT+hasyn	21	13.381	281						t Statistic	DF	Prob>|t|						t Statistic	DF	Prob>|t|
0.63523	0.57486		0.57969	0.49482		0.60073	0.44834											Test Statistics								Equal Variance Assumed	-1.23404	25	0.22866					Equal Variance Assumed	3.04838	16	0.00766
0.61889	0.25282		0.54885	0.51967															U	Z	Asymp. Prob>|U|					Equal Variance NOT Assumed (Welch Correction)	-1.35439	24.5826	0.18793					Equal Variance NOT Assumed (Welch Correction)	3.04838	14.3539	0.00847
0.66618	0.24864		0.49154	0.54267															391	4.27648	1.89875e-05
0.5863	0.49316		0.47149
0.62864	0.33039		0.64744
0.59048	0.6543		0.51888
0.66597	0.28653		0.45682
0.65009	0.40387		0.56541
0.59481	0.32043
0.61634	0.33747
0.47336	0.42103
0.57861	0.48202
0.64183	0.23762
Panel D
Time Constant WT TKO (time 20-180 sec in Fig. 1B)					Units=sec
WT	WT+hasyn		TKO	TKO+hasyn		Normality Test (26/11/2023 14:25:38)							Kruskal Wallis ANOVA			WT TKO
45.9984	29.157		131.717	48.4986			DF	Statistic	p-value	Decision at level(5%)			Kruskal-Wallis ANOVA (26/11/2023 14:28:07)
51.639	41.9047		52.8864	77.8608		WT	19	0.94674	0.34725	Can't reject normality			Descriptive Statistics
63.6646	50.3978		52.6828	73.9336		WT+hasyn	18	0.88848	0.03634	Reject normality				N	Min	Q1	Median	Q3	Max
44.4433	19.8612		31.113	58.9988		TKO	12	0.82123	0.0165	Reject normality			WT	19	28.6051	40.5294	51.639	66.8168	82.7628
82.1439	50.4164		63.9925	47.995		TKO+hasyn	12	0.93226	0.40471	Can't reject normality			WT+hasyn	18	19.8612	28.9906	50.325	61.0607	119.921
53.0528	50.2523		59.6362	61.9344									TKO	12	31.113	44.4047	56.2613	69.6893	131.717
67.3333	67.8805		68.4081	38.2621									TKO+hasyn	12	38.2621	48.1209	54.7343	71.4512	79.9113
82.7628	76.697		70.1163	50.4698									Ranks
49.2209	54.2454		35.9503	50.1821										N	Mean Rank	Sum Rank
60.9551	35.0699		43.4865	64.0038									WT	19	31.3158	595
58.6174	43.1059		72.6991	40.7526									WT+hasyn	18	25.2222	454
80.3265	28.4916		47.1593	79.9113									TKO	12	35.1667	422
36.8094	50.9608												TKO+hasyn	12	35	420
39.285	119.921												Test Statistics
35.2053	60.4925													Chi-Square	DF	Prob>Chi-Square
66.8168	23.0912													3.18281	3	0.36429
28.6051	62.7651
40.5294	19.9677
43.706
Panel E
Time constants Synapsin Isoforms (time 20-180 sec in Fig. 1F)						Units=sec
SynIa	SynIa+hasyn		SynIb	SynIb+hasyn		SynIIa	SynIIa+hasyn		SynIIb	SynIIb+hasyn		SynIIIa	SynIIIa+hasyn			Shapiro-Wilk								Kruskal-Wallis ANOVA
70.4228	36.7511		126.759	66.6236		51.803	54.7301		59.6643	96.9287		71.3493	56.6077			Normality Test (26/11/2023 14:34:49)								Kruskal-Wallis ANOVA (26/11/2023 14:36:27)
61.4417	52.4588		69.015	64.1096		99.5131	35.0405		79.4812	50.5416		66.2761	55.2928				DF	Statistic	p-value	Decision at level(5%)				Descriptive Statistics
130.56	44.8152		53.9282	104.241		43.8932	51.919		36.6281	99.6001		53.7784	52.3877			SynIa	13	0.69115	0.000453279	Reject normality					N	Min	Q1	Median	Q3	Max
65.085	70.5828		49.2321	75.5095		71.1858	89.3542		69.4063	70.7712		60.8109	101.52			SynIa+hasyn	14	0.92179	0.23327	Can't reject normality				SynIa	13	37.6395	49.9584	55.2794	63.2634	130.56
49.687	73.0664		45.9171	57.1677		46.3382	86.3005		60.5104	103.453		42.9962	62.2004			SynIb	14	0.88355	0.06531	Can't reject normality				SynIa+hasyn	14	30.8701	41.4118	61.2612	88.3799	133.279
53.5606	41.9194		28.8062	45.0924		49.4347	55.2858		42.9979	50.5003		78.6145	85.6614			SynIb+hasyn	11	0.9355	0.4691	Can't reject normality				SynIb	14	28.8062	36.3459	51.2475	83.5586	126.759
50.2297	103.132		44.0811	75.3185		60.7353	80.975		68.3754	56.5413		42.6037	80.8519			SynIIa	10	0.86319	0.0832	Can't reject normality				SynIb+hasyn	11	34.557	45.0924	57.1677	75.3185	104.241
55.2794	69.6844		83.3875	51.4296		66.5724	35.6649		67.0826	119.336		41.2263	48.196			SynIIa+hasyn	10	0.9415	0.56981	Can't reject normality				SynIIa	10	43.8932	48.6605	59.0204	67.7257	99.5131
58.2371	52.8381		84.8656	46.444		61.7477	22.147		56.5528	54.8306		70.8605	66.4157			SynIIb	12	0.92482	0.32837	Can't reject normality				SynIIa+hasyn	10	22.147	35.5088	55.008	87.0639	103.534
42.916	89.3576		31.7805	34.557		57.3055	103.534		65.5037	44.8581		81.8025	116.029			SynIIb+hasyn	12	0.87596	0.07782	Can't reject normality				SynIIb	12	36.6281	57.3307	63.1861	69.1486	79.4812
37.6395	30.8701		53.2628	40.6057					60.8686	66.1861		64.9467	65.3275			SynIIIa	26	0.91552	0.03535	Reject normality				SynIIb+hasyn	12	44.8581	51.6139	63.5691	98.9323	119.336
53.2408	88.0541		84.0722						71.7816	60.952		55.8321	138.072			SynIIIa+hasyn	23	0.91671	0.05666	Can't reject normality				SynIIIa	26	32.4224	42.2594	54.3377	71.656	108.611
59.895	39.8888		37.1688									50.5412	139.151											SynIIIa+hasyn	23	25.8497	48.196	62.2476	85.6614	139.151
	133.279		33.8774									108.611	62.2476											Ranks
												108.611	70.1229												N	Mean Rank	Sum Rank
												54.897	53.3769											SynIa	13	67.4615	877
												76.6275	35.5542											SynIa+hasyn	14	75	1050
												46.9509	43.0536											SynIb	14	61.7143	864
												72.5759	25.8497											SynIb+hasyn	11	69.9091	769
												53.6971	95.9191											SynIIa	10	72.6	726
												47.6309	71.0054											SynIIa+hasyn	10	70.9	709
												37.723	38.4129											SynIIb	12	79.5	954
												35.4958	33.5424											SynIIb+hasyn	12	89.1667	1070
												33.6291												SynIIIa	26	66.0769	1718
												32.4224												SynIIIa+hasyn	23	80.3478	1848
												35.1768												Test Statistics
																									Chi-Square	DF	Prob>Chi-Square
																									4.82947	9	0.84891
[truncated: 62 more columns]
