# Supplementary material for: Synapsin E-domain is essential for α-synuclein function
Source: eLife. 2024 May 7;12:RP89687. doi: 10.7554/eLife.89687 (PMC11076041; doi:10.7554/eLife.89687)
Supplement: Figure 1—source data 1. [file elife-89687-fig1-data1.xlsx]

## Sheet: Figure 1
Panel b	WT vs TKO		Units = DF/F0
Normalized and background-subtracted sypHy fluorescence as a function of time (in seconds). Field stimulation of a duration of 15 sec at 20Hz starts at t=0 (image #6).
WT																								WT+hasyn																							Synapsin TKO
Time (sec)																				N total	Mean	SE of mean		Time																			N total	Mean	SE of mean		Time
-24.984	0.0019	0.00592	0.01563	-0.04584	0.02836	0.04214	0.00335	0.02383	-0.03835	0.01231	0.00562	0.19249	-0.01794	0.01591	-0.04066	-0.08858	0.03767	0.08989	0.06053	19	0.01601	0.01353		-24.992	-0.0299	-0.03005	-0.02492	-0.00449	-0.02615	0.04513	-0.02641	-0.04141	-0.00312	0.00054657	0.04476	-0.00162	0.03139	0.00525	-0.01064	0.02209	-0.05112	0.01612	18	-0.0047	0.00669		-24.981	0.00683	-0.05317
-20.005	0.00854	0.01494	0.01968	0.01529	-0.02942	-0.00638	-0.01604	0.00565	0.02735	-0.01439	0.02678	0.08875	0.00146	-0.01035	-0.00942	-0.01873	-0.0262	-0.04813	0.00436	19	0.00178	0.00666		-19.983	-0.00821	-0.01476	0.01465	-0.01349	0.04388	-0.01987	-0.00671	0.02071	-0.04404	0.04136	0.03039	0.000452634	-0.02706	-0.02812	-0.02018	0.061	-0.04182	0.03557	18	0.00132	0.00738		-19.993	0.03038	-0.05557
-15.006	0.00473	0.00871	0.01176	-0.00138	-0.00817	-0.0205	0.00541	0.02024	-0.02462	-0.03684	0.000978286	-0.09054	-0.00127	0.01336	-0.01159	-0.02832	-0.0079	0.00338	0.01594	19	-0.00772	0.00583		-15.001	0.01239	-0.01758	-0.0347	0.000797978	-0.02461	0.01983	0.00591	-0.01715	-0.00401	0.00639	-0.04235	0.01384	-0.01766	0.01262	0.01647	-0.04649	0.05368	-0.02963	18	-0.00512	0.00606		-14.988	0.0098	0.01317
-10.003	0.00291	-0.00253	-0.02427	0.02383	-0.02143	0.021	0.00508	0.01428	0.00688	0.0213	-0.04843	-0.07269	0.0495	0.02332	0.03486	0.12678	-0.03705	-0.02359	-0.03018	19	0.00366	0.00987		-9.987	-0.000107124	0.00289	0.02842	-0.02611	-0.00185	-0.02202	0.01863	-0.03032	0.02246	-0.00558	-0.13556	0.05413	0.02265	0.000296711	0.00814	-0.02633	0.00529	-0.00452	18	-0.00497	0.00921		-9.98	0.03353	0.03945
-5.003	-0.01891	-0.00654	-0.01788	0.0032	0.01627	-0.00821	-0.00185	-0.02733	0.00117	0.01231	0.00562	0.19249	-0.01794	-0.04224	0.02682	0.00886	0.03349	-0.02155	-0.05064	19	0.00459	0.01156		-4.993	-0.00768	0.02215	0.00322	0.03362	0.01505	-0.00524	0.02171	0.02379	-0.07425	0.09762	-0.16635	-0.06681	-0.00932	0.00996	0.0062	-0.01027	0.03397	-0.01754	18	-0.00501	0.01297		-4.998	-0.03717	0.02878
0	0.000823774	-0.02049	-0.00492	0.00489	0.01439	-0.02805	0.00405	-0.03667	0.02757	-0.0125	-0.03539	-0.04613	0.13427	-0.03931	0.01205	0.01797	-0.02129	0.06967	-0.01016	19	0.00162	0.00975		0	0.03352	0.03735	0.01333	0.00967	-0.00632	-0.01783	-0.01313	0.04436	0.20456	0.1929	0.15046	0.06308	-0.01581	0.00934	0.02706	-0.07832	0.01476	-0.02997	18	0.0355	0.01777		0	0.428	0.02734
5.008	0.57947	0.17239	0.62064	0.65468	0.61536	0.42514	0.48188	0.49746	0.31684	0.53576	0.88019	0.29012	0.68548	0.43529	0.43241	0.35196	0.7873	1.14848	0.42452	19	0.54397	0.0522		5.014	0.22156	0.20168	0.40982	0.11931	0.30465	0.23565	0.40098	0.27123	0.47363	0.56894	0.55833	0.25738	0.3346	0.24014	0.21405	0.30433	0.36696	0.02213	18	0.30585	0.03333		5.006	0.97097	0.52373
10.015	0.95251	0.35754	1.13127	1.09363	1.08022	0.75048	0.76773	0.81472	0.6493	0.85592	1.29633	0.87531	1.16343	0.69194	0.80344	0.79408	1.38087	1.67415	0.63835	19	0.93533	0.07047		10.012	0.42403	0.40231	0.63299	0.29872	0.4499	0.39503	0.69409	0.55209	0.60059	0.70983	0.72231	0.5601	0.61453	0.38443	0.35985	0.71595	0.4447	0.12835	18	0.50499	0.03911		10	1.20854	0.93671
14.995	1.0403	0.48044	1.53834	1.36783	1.35779	0.91623	1.08885	1.19795	0.89825	1.19222	1.67301	1.13651	1.27695	0.83119	1.09563	1.02887	1.62412	2.11765	0.95038	19	1.20066	0.08358		15.017	0.63666	0.4983	0.71034	0.45307	0.68051	0.49114	0.78547	0.69931	0.62265	0.53059	0.79752	0.72878	0.67427	0.54608	0.46918	0.84105	0.62595	0.1662	18	0.60873	0.03792		15.007	1.2672	1.17038
19.995	1.04328	0.4772	1.59004	1.351	1.27938	0.83794	1.09892	1.157	0.88336	1.06443	1.56694	1.0284	1.28126	0.73123	1.07651	1.0689	1.38019	1.7928	0.95101	19	1.13999	0.07235		20.016	0.56967	0.46551	0.70118	0.41598	0.70802	0.4982	0.83505	0.71626	0.47394	0.359	0.70835	0.59726	0.71134	0.50667	0.40251	0.65845	0.42225	0.11908	18	0.54826	0.04114		20.012	1.03739	1.07739
25.001	0.88966	0.52308	1.36045	1.23919	1.23211	0.74845	1.13035	0.98624	0.83774	0.94607	1.40422	0.99235	1.23558	0.66185	0.928	1.01956	1.27412	1.59837	0.84502	19	1.04486	0.06279		25	0.5642	0.42315	0.63724	0.30109	0.51641	0.47657	0.77873	0.74834	0.48052	0.33641	0.49294	0.55046	0.55906	0.48601	0.38762	0.44652	0.42788	0.1226	18	0.48532	0.03621		25.02	1.05914	0.95528
29.996	0.81449	0.48381	1.26757	1.11084	0.98398	0.72323	1.03504	0.90529	0.70996	0.84876	1.21457	0.908	0.96858	0.55163	0.79413	0.86635	1.06721	1.38115	0.7315	19	0.914	0.05345		30.001	0.48556	0.37692	0.53853	0.22029	0.47046	0.4087	0.69536	0.70658	0.35088	0.24913	0.33737	0.48305	0.55748	0.42587	0.32679	0.42606	0.39758	0.07837	18	0.41861	0.03662		30.004	0.92694	0.83392
35.004	0.75756	0.42565	1.14399	0.96315	0.94324	0.58008	0.95766	1.06496	0.65663	0.81804	1.13529	0.94299	0.82056	0.52094	0.6875	0.82414	0.89876	1.29381	0.70283	19	0.84936	0.05166		35.143	0.4907	0.36236	0.52276	0.16387	0.42844	0.3668	0.66322	0.61764	0.34118	0.18747	0.42924	0.42888	0.41823	0.45281	0.25537	0.2088	0.3637	0.06509	18	0.37592	0.03674		35.002	0.97369	0.72665
40.008	0.67655	0.36842	1.10965	0.90012	0.88886	0.56786	0.92436	0.99371	0.57716	0.76895	1.02041	0.93037	0.77136	0.45015	0.60779	0.76347	0.77768	1.10574	0.56879	19	0.77744	0.04949		40.004	0.36859	0.31471	0.47012	0.13015	0.46142	0.37375	0.65717	0.56059	0.27595	0.08938	0.2734	0.45124	0.4498	0.44584	0.25244	0.11252	0.21287	0.06028	18	0.33112	0.03989		40.003	0.87275	0.71494
45.015	0.64154	0.32317	1.00648	0.7777	0.85847	0.52016	0.90525	0.80447	0.46692	0.69385	0.9615	1.04598	0.61715	0.39589	0.50718	0.70935	0.72809	0.9273	0.53923	19	0.70683	0.04874		45.012	0.3125	0.28436	0.42639	0.11806	0.44017	0.26551	0.60382	0.54163	0.24603	0.07797	0.32776	0.3634	0.36025	0.39428	0.24962	0.15095	0.21073	0.01828	18	0.29954	0.03627		45.004	0.84756	0.6466
49.995	0.54121	0.35892	0.9343	0.70767	0.92276	0.45731	0.83482	0.81244	0.43836	0.70458	0.88485	0.68152	0.68646	0.31343	0.43581	0.7032	0.47963	0.85087	0.42792	19	0.64085	0.04643		50.15	0.36721	0.25306	0.45101	0.01934	0.34079	0.1867	0.59163	0.59864	0.15835	0.06286	0.14056	0.31054	0.33155	0.37221	0.18672	0.01429	0.25291	-0.00135	18	0.25761	0.04279		50.003	0.85634	0.48882
55.009	0.50186	0.3106	0.92276	0.61043	0.82181	0.47116	0.81729	0.79964	0.35216	0.63626	0.799	0.8608	0.56534	0.25146	0.41963	0.65362	0.47253	0.81821	0.33665	19	0.60112	0.04873		55.027	0.38653	0.24065	0.38182	0.01297	0.30866	0.20693	0.5069	0.50438	0.14942	0.03809	0.13193	0.31522	0.25318	0.35519	0.18185	0.02927	0.13638	-0.01895	18	0.22891	0.03806		55.011	0.77208	0.47652
59.994	0.50064	0.27706	0.93892	0.59859	0.76398	0.32767	0.76322	0.72526	0.30805	0.5335	0.77645	0.88644	0.42598	0.22657	0.3516	0.62722	0.42284	0.63616	0.33077	19	0.54847	0.05021		60.003	0.32238	0.2061	0.25387	-0.02135	0.3244	0.1443	0.49583	0.45639	0.09827	-0.10575	0.07578	0.25116	0.27654	0.33996	0.15828	0.02043	0.16356	-0.01265	18	0.19153	0.039		60.021	0.74563	0.49234
64.996	0.41562	0.27826	0.80452	0.49675	0.67139	0.4185	0.7326	0.61479	0.25357	0.48806	0.62464	0.71383	0.38914	0.26239	0.33124	0.51579	0.37827	0.63069	0.33071	19	0.49215	0.03942		65.142	0.30589	0.21833	0.35032	-0.00182	0.27087	0.12864	0.46178	0.35713	0.13037	0.05218	0.1716	0.06517	0.18173	0.33556	0.15674	-0.03165	0.17172	-0.06234	18	0.18123	0.03437		65.001	0.62065	0.42512
70.013	0.44001	0.2921	0.82503	0.43431	0.67217	0.28019	0.69839	0.68544	0.16908	0.45171	0.68816	0.60765	0.24918	0.2297	0.25973	0.48553	0.26243	0.50128	0.38256	19	0.4534	0.04492		70.001	0.30203	0.22809	0.32058	-0.06616	0.31059	0.26308	0.41459	0.40146	0.10124	-0.05064	0.12597	-0.01532	0.1473	0.31752	0.11491	-0.02041	0.06496	-0.05728	18	0.16125	0.0385		70.003	0.71626	0.43008
75.012	0.33663	0.23065	0.82864	0.45674	0.57797	0.27337	0.62793	0.71005	0.15114	0.44823	0.53346	0.50113	0.4292	0.16728	0.27236	0.51061	0.25846	0.43925	0.31043	19	0.4244	0.04222		75.004	0.29916	0.18196	0.18491	-0.06703	0.21738	0.29891	0.38208	0.40722	0.04843	0.00522	0.13366	-0.00833	0.13599	0.30468	0.09459	-0.02555	0.11808	-0.07903	18	0.14624	0.03552		75.003	0.57192	0.39652
80.019	0.34331	0.217	0.85984	0.34939	0.57378	0.29506	0.65402	0.59037	0.06592	0.42702	0.49469	0.50138	0.31115	0.15777	0.21793	0.44241	0.19185	0.46423	0.19789	19	0.38711	0.04559		80.15	0.27539	0.21693	0.19329	-0.06777	0.20761	0.26315	0.37586	0.35192	0.02542	-0.01033	0.00401	-0.01887	0.05267	0.26591	0.08608	-0.18044	0.1563	-0.08062	18	0.11758	0.03787		80.003	0.47099	0.35142
85.136	0.33658	0.17646	0.78499	0.32242	0.52805	0.23828	0.60707	0.63054	0.07882	0.41178	0.46156	0.66386	0.26018	0.14291	0.16784	0.48875	0.25334	0.30821	0.23494	19	0.3735	0.04572		85.02	0.24343	0.1754	0.19502	-0.13778	0.17517	0.20277	0.3132	0.32259	-0.02973	-0.08703	0.03975	0.05917	0.18803	0.23206	0.09765	-0.13743	0.04133	-0.06684	18	0.10149	0.03491		85.007	0.65577	0.37901
89.994	0.33056	0.2056	0.74056	0.2943	0.38763	0.16885	0.61745	0.50766	0.06747	0.39357	0.45487	0.64366	0.29348	0.12312	0.20444	0.32878	0.09572	0.26628	0.17305	19	0.33142	0.0439		90.002	0.23092	0.15582	0.22859	-0.08868	0.15478	0.22142	0.2754	0.30681	0.01497	-0.10002	0.01322	-0.00656	0.14347	0.25067	0.0907	-0.09069	0.07871	-0.08108	18	0.09991	0.03254		90.015	0.4832	0.30366
94.998	0.29832	0.19102	0.77666	0.20611	0.41109	0.20086	0.58724	0.58968	0.00469	0.33439	0.43684	0.56909	0.18774	0.11239	0.221	0.31804	0.12875	0.29561	0.21363	19	0.32017	0.04522		95.034	0.21485	0.2091	0.14398	-0.13855	0.13609	0.17859	0.26713	0.30509	-0.03721	-0.01859	-0.0357	0.026	0.02147	0.19578	0.10454	-0.158	0.07893	-0.06307	18	0.07947	0.03232		95.024	0.46978	0.28007
100.128	0.30393	0.17219	0.67339	0.18024	0.35682	0.1264	0.52658	0.60797	0.04048	0.33115	0.42549	0.52902	0.19312	0.08066	0.13722	0.35421	0.04638	0.19571	0.16258	19	0.2865	0.04412		99.963	0.27566	0.15294	0.17959	-0.08582	0.12444	0.16923	0.23326	0.22497	-0.05462	-0.10579	0.03956	0.05208	0.01892	0.18681	0.0668	-0.07218	0.02796	-0.02336	18	0.07836	0.02814		100.003	0.55242	0.28705
105.003	0.23879	0.16663	0.62458	0.21066	0.31422	0.11456	0.52863	0.51259	-0.04815	0.32063	0.33786	0.31667	0.22369	0.07219	0.13558	0.38062	0.103	0.32342	0.09632	19	0.26171	0.03953		105.002	0.23525	0.12532	0.12282	-0.084	0.08789	0.17757	0.25811	0.26141	-0.02688	-0.06406	0.13915	0.02628	0.05268	0.18372	0.03887	-0.14093	0.00991	-0.07025	18	0.07405	0.02895		105.002	0.46943	0.26763
110.012	0.22173	0.16758	0.57573	0.12682	0.33869	0.12167	0.5247	0.47746	-0.02405	0.24826	0.36195	0.47837	0.1155	0.09013	0.05549	0.21901	0.13297	0.18529	0.17024	19	0.24145	0.0392		110.148	0.20731	0.14543	0.06657	-0.10602	0.17276	0.09615	0.16213	0.23767	-0.08887	-0.11514	0.02933	-0.04164	-0.01174	0.14231	0.03669	-0.1192	0.04413	-0.10114	18	0.04204	0.02811		110.003	0.52207	0.20846
115.135	0.20994	0.1326	0.53704	0.17226	0.3507	0.08094	0.45918	0.47411	-0.08932	0.22525	0.27824	0.39742	0.18233	0.10228	0.08093	0.36983	0.02097	0.17945	0.10182	19	0.22452	0.03866		115.016	0.22702	0.10755	0.06415	-0.05964	0.13056	0.16257	0.16011	0.20792	-0.1168	-0.15932	0.0581	0.03968	-0.01887	0.15009	0.03928	-0.15671	-0.02753	-0.09214	18	0.03978	0.02897		115.002	0.41928	0.2523
120.001	0.22368	0.14794	0.54506	0.09672	0.30676	0.05228	0.48167	0.39472	-0.06637	0.29268	0.28619	0.12967	0.10384	0.05794	0.04684	0.25781	0.05596	0.1034	0.02962	19	0.18665	0.03775		120.02	0.18345	0.12187	0.10768	-0.10579	0.07336	0.13652	0.18494	0.23326	-0.10963	-0.04041	-0.03822	-0.02718	0.00192	0.15085	0.04799	-0.13138	0.03603	-0.03068	18	0.04414	0.02615		120.007	0.39055	0.20311
125.002	0.18769	0.12274	0.53515	0.10653	0.23945	0.08823	0.44481	0.39032	-0.0631	0.19247	0.24901	0.25839	0.0887	0.06093	0.1041	0.22509	0.04436	0.22327	0.12755	19	0.19083	0.03344		125.155	0.18755	0.11042	0.10462	-0.0908	0.07714	0.13202	0.19446	0.22719	-0.12244	-0.0996	-0.16489	0.04904	-0.0072	0.10271	0.03471	-0.12979	0.03039	-0.07036	18	0.0314	0.02862		125.015	0.41668	0.20137
130.143	0.19262	0.12628	0.47674	0.11527	0.22714	0.0654	0.47171	0.33133	-0.08366	0.19622	0.18879	0.1524	0.10682	0.00301	0.09092	0.20469	0.04964	0.12444	0.01605	19	0.16083	0.03309		130.002	0.2586	0.10624	0.07087	-0.09446	0.08659	0.09513	0.18854	0.15959	-0.1324	-0.14565	-0.15586	0.0713	-0.00638	0.11242	-0.000123864	-0.2056	-0.07247	-0.04634	18	0.01611	0.03107		130.024	0.33046	0.11823
134.999	0.15039	0.10967	0.48727	0.11848	0.2053	0.01044	0.45952	0.36593	-0.11539	0.17278	0.20747	0.29619	0.11598	0.02919	0.10223	0.20971	0.13341	0.09173	0.10293	19	0.17122	0.03402		135.003	0.21588	0.05327	0.06505	-0.06615	0.05474	0.11803	0.15253	0.1558	-0.16856	-0.11007	-0.12955	0.02209	0.01573	0.12579	0.01965	-0.17886	0.08247	-0.03574	18	0.02178	0.02731		135.005	0.3895	0.11791
140.003	0.17963	0.13476	0.55104	0.0601	0.20703	0.00151	0.47136	0.378	-0.11998	0.16558	0.17688	0.26004	0.0616	0.04335	0.05492	0.18221	0.08512	0.08672	0.13032	19	0.16369	0.0371		140.001	0.25361	0.12741	-0.00164	-0.00124	0.07858	0.14978	0.1478	0.18348	-0.12584	-0.16245	0.01831	0.02771	-0.07783	0.10451	-0.00374	-0.12171	0.000876634	-0.02218	18	0.03197	0.02693		140.003	0.27885	0.16349
145.15	0.15026	0.14131	0.47646	0.06843	0.19083	0.07664	0.42565	0.29952	-0.12581	0.21638	0.19271	0.23603	0.11782	-0.00309	0.05843	0.13086	0.0426	0.05395	0.06385	19	0.14804	0.03288		145.007	0.28099	0.11824	0.07876	-0.07174	0.06018	0.01046	0.14919	0.13966	-0.17894	-0.12599	-0.14064	0.09206	-0.14024	0.12423	-0.0033	-0.13726	-0.05661	0.01811	18	0.01206	0.03029		145.005	0.20273	0.0748
149.995	0.17669	0.12845	0.44574	0.02031	0.16806	0.03337	0.42709	0.37209	-0.16516	0.17327	0.11886	0.38247	0.05972	0.02599	0.04797	0.13581	0.11847	0.000136412	0.02892	19	0.14201	0.03713		150.015	0.27189	0.09193	0.08561	-0.07137	0.07804	0.04558	0.10927	0.15182	-0.19047	-0.13481	-0.09964	0.10386	-0.0428	0.09805	-0.00623	-0.10113	-0.06241	-0.00739	18	0.01777	0.0276		150.005	0.20101	0.11169
154.996	0.1774	0.14165	0.41346	0.09135	0.1201	0.03635	0.43216	0.36066	-0.14315	0.18847	0.07261	0.51548	0.08292	0.02936	0.06497	0.23353	0.1023	0.06035	-0.01988	19	0.15579	0.03863		155.024	0.22058	0.0912	0.049	-0.06058	0.08142	0.06236	0.14984	0.14545	-0.18602	-0.17083	-0.25466	0.09465	0.00935	0.07944	-0.0299	-0.14531	-0.075	-0.03027	18	0.00171	0.03077		155.007	0.15627	0.11059
160.031	0.15768	0.10561	0.46846	0.02033	0.14631	0.05004	0.39688	0.39299	-0.16172	0.19329	0.15909	0.51604	0.06386	0.02313	0.03441	0.13578	0.10393	0.06818	0.02595	19	0.15264	0.0399		160.001	0.25298	0.11856	0.05021	-0.04966	0.08038	0.08586	0.13014	0.12695	-0.14725	-0.15131	-0.22534	0.04877	-0.07462	0.10529	-0.01618	-0.11614	0.00757	-0.07171	18	0.00858	0.02926		160.015	0.22927	0.12828
164.958	0.10817	0.0895	0.41073	0.08675	0.10175	0.01791	0.36731	0.30242	-0.18985	0.15268	0.06588	0.20265	0.0484	-0.01423	0.04498	0.13312	0.03903	0.01882	0.06332	19	0.10786	0.03176		165.002	0.22041	0.16194	0.06741	-0.08012	0.0457	0.06537	0.10609	0.17553	-0.12364	-0.15699	0.0153	0.05667	-0.11358	0.10188	-0.05283	-0.26253	-0.04634	-0.02229	18	0.00878	0.02991		165.023	0.18018	0.12012
169.999	0.09101	0.11649	0.42976	0.07707	0.05815	0.01538	0.39625	0.29695	-0.13496	0.12968	0.08064	0.48448	0.05607	0.02776	0.02327	0.16251	0.09994	0.12036	-0.03258	19	0.13149	0.03689		170.001	0.1928	0.1005	0.06095	-0.09263	0.10724	0.07524	0.13708	0.09003	-0.13544	-0.16972	-0.12329	0.07784	-0.07241	0.06128	-0.0281	-0.14338	-0.10499	-0.0266	18	0.00035593	0.02645		170.03	0.16398	0.04506
175.149	0.10438	0.12765	0.43287	0.10203	0.11912	0.02171	0.35846	0.32949	-0.13274	0.09846	0.07544	0.15855	0.0514	-0.00057976	0.03016	0.14752	0.1408	0.07887	-0.0087	19	0.11763	0.03075		175.004	0.20995	0.06991	0.06565	-0.02057	0.0247	0.07891	0.07354	0.14049	-0.15081	-0.12216	-0.1903	0.08264	-0.0718	0.05593	-0.06749	-0.11571	-0.10284	-0.04389	18	-0.00466	0.02587		175.008	0.34037	0.03587
180.011	0.16553	0.09969	0.3389	0.0317	0.12259	0.05957	0.37824	0.29907	-0.16116	0.10338	0.05387	0.2519	0.08006	-0.00473	0.01665	0.10869	0.10332	-0.00681	0.0504	19	0.11005	0.03006		180.007	0.23743	0.11088	0.0506	-0.0303	-0.00127	0.06239	0.08217	0.0542	-0.18367	-0.2034	-0.03421	-0.0848	-0.14246	0.00582	-0.04416	-0.24233	-0.14783	-0.04847	18	-0.03108	0.02898		180.004	0.14578	0.03758
Panel c			Units = DF/F0
Peak sypHy signal		Measured at t~=15 sec in panel b (end of stimulation, image #9)
						Shapiro-Wilk Normality Test							t-test WT vs WT+hasyn								t-test TKO vs TKO+hasyn
WT	WT+hasyn		TKO	TKO+hasyn		Normality Test (25/12/2022 15:32:20)							Two sample t Test (11/12/2022 15:45:13)								Two sample t Test (07/04/2024 14:32:18)
1.0403	0.63666		1.2672	0.80407		NormalityTest							Descriptive Statistics								Descriptive Statistics
0.48044	0.4983		1.17038	1.18711		Shapiro-Wilk									N	Mean	SD	SEM	Median				N	Mean	SD	SEM	Median
1.53834	0.71034		0.92492	1.41488			DF	Statistic	p-value	Decision at level(5%)			WT		19	1.20066	0.36431	0.08358	1.13651		TKO		12	1.06422	0.47667	0.1376	0.94425
1.36783	0.45307		0.7326	0.8182		WT	19	0.96083	0.58881	Can't reject normality			WT aSyn		18	0.60873	0.1609	0.03792	0.6313		TKO aSyn		12	1.21297	0.48255	0.1393	1.23813
1.35779	0.68051		0.77585	1.31912		WT aSyn	18	0.92624	0.16672	Can't reject normality				Difference		0.59193		0.09351				Difference	12	-0.14875		0.1958	-0.09084
0.91623	0.49114		1.11114	1.28914		TKO	12	0.88404	0.09877	Can't reject normality				Overall	37	0.91269	0.41055	0.06749	0.83119			Overall	24	1.13859	0.47519	0.097	1.03736
1.08885	0.78547		1.67624	1.65493		TKO aSyn	12	0.9016	0.16634	Can't reject normality			t-Test Statistics								t-Test Statistics
1.19795	0.69931		2.19548	2.29156										t Statistic	DF	Prob>|t|						t Statistic	DF	Prob>|t|
0.89825	0.62265		0.86634	1.57122									Equal Variance Assumed	6.32991	35	2.84543e-07					Equal Variance Assumed	-0.7597	22	0.4555
1.19222	0.53059		0.84319	0.80028									Equal Variance NOT Assumed (Welch Correction)	6.4495	25.0509	9.30171e-07					Equal Variance NOT Assumed (Welch Correction)	-0.7597	21.9967	0.4555
1.67301	0.79752		0.45868	0.67555
1.13651	0.72878		0.754	0.72956
1.27695	0.67427
0.83119	0.54608
1.09563	0.46918
1.02887	0.84105
1.62412	0.62595
2.11765	0.1662
0.95038
Panel f	Synapsin isoforms		Units = DF/F0
Normalized and background-subtracted sypHy fluorescence as a function of time (in seconds). Field stimulation of a duration of 15 sec at 20Hz starts at t=0 (image #6).
Synapsin Ia																		Synapsin Ia+hasyn																			Synapsin Ib
Time														N total	Mean	SE of mean		Time															N total	Mean	SE of mean		Time
-25.024	-0.00314	-0.0082	-0.0384	5.32192e-05	0.07197	0.00306	-0.01614	-0.03992	-0.01712	0.02478	0.02485	-0.08718	-0.00279	13	-0.00678	0.01048		-24.987	0.02512	-0.0256	-0.000182102	-0.02163	-0.00584	-0.02342	0.00415	-0.08411	0.00613	0.03361	0.055	0.03472	-0.02577	0.01891	14	-0.000637555	0.00933		-25.005	-0.02245	0.00113	0.00437	0.02287	-0.05359	-0.08081	0.01928	-0.04467	-0.02458	0.01992	-0.00277	0.0214
-20.014	-0.02026	0.02584	-0.01032	0.00884	0.00611	-0.02984	-0.00247	-0.0123	-0.00105	-0.00427	-0.05087	-0.04775	0.04257	13	-0.00737	0.00731		-19.98	-0.02509	0.01706	-0.02698	-0.00888	0.007	0.000128348	-0.0115	-0.06518	0.01182	-0.00422	0.03125	0.00714	-0.06675	-0.0037	14	-0.00985	0.00758		-19.852	-0.000784403	-0.03975	0.01966	-0.0173	0.07852	-0.00781	0.01524	0.03687	0.03029	0.03456	-0.01271	-0.00163
-15.014	0.00623	-0.01175	0.00744	-0.03369	0.00315	0.01601	0.0169	0.01073	0.03238	0.01445	0.0235	0.08817	0.02008	13	0.01489	0.00765		-14.972	0.02076	-0.10573	-0.0048	0.04908	-0.06649	0.02289	0.01289	0.02814	-0.0671	-0.04445	-0.03057	-0.04767	-0.09226	-0.10069	14	-0.03043	0.01393		-14.984	0.05535	-0.01828	-0.02078	-0.01145	0.02495	0.00216	-0.01464	-0.00439	-0.00539	-0.01758	0.03468	-0.02999
-10.037	0.00342	0.01732	0.000834546	0.04184	-0.02378	-0.02061	0.00398	0.02095	-0.01444	-7.52981e-05	0.0657	0.07101	-0.02672	13	0.01073	0.00888		-9.965	-0.01174	0.00564	0.01456	-0.00222	0.0701	0.01508	-0.01319	0.01939	0.01492	-0.000896281	-0.01475	0.00444	0.10521	0.09155	14	0.02129	0.01039		-9.977	-0.01865	0.00385	0.01295	0.02335	-0.02008	0.04377	-0.00728	-0.02796	-0.01278	-0.07563	-0.02553	0.000861907
-5.035	0.03095	0.0109	0.01939	0.02773	-0.01246	-0.01662	0.00227	-0.01866	0.000235583	-0.03489	-0.06318	-0.02426	-0.03314	13	-0.00859	0.00757		-4.997	0.03562	0.04513	0.04138	-0.02675	-0.02799	0.0206	0.03432	0.01412	0.03424	0.01595	-0.04093	0.00137	0.07956	-0.00607	14	0.01575	0.00887		-5.008	-0.0295	0.04903	-0.01515	0.00706	-0.05501	-0.00614	-0.000598757	0.03464	0.00589	0.01186	-0.02563	0.00935
-0.037	-0.0172	-0.03411	0.02105	-0.04477	-0.04499	0.048	-0.00454	0.0392	-0.01947	-0.03192	0.0114	0.03062	-0.06103	13	-0.00829	0.00983		0.011	-0.04467	0.0635	-0.02398	0.01039	0.02321	-0.03527	-0.02667	0.08764	-0.01662	-0.02788	-0.03727	-0.04231	-0.00242	-0.09205	14	-0.01174	0.01233		0	0.01603	0.00402	-0.00104	-0.02453	0.0252	0.04883	-0.01201	0.00552	0.00658	0.02688	0.03198	0.0652
4.967	0.26638	0.69692	0.30662	0.61008	0.3203	0.55469	0.71148	0.56773	0.51731	0.5818	0.86093	0.71213	0.3712	13	0.54443	0.05068		5.008	0.11671	0.27537	0.20826	0.26991	0.4409	0.52263	0.32566	0.54105	0.30092	0.43607	0.37149	0.40057	0.35705	0.25235	14	0.34421	0.03176		4.996	0.37359	0.44787	0.60953	0.41491	0.55125	0.38198	0.60608	0.87829	0.3266	0.5324	0.84723	0.4913
9.973	0.48524	1.27111	0.54441	1.15371	0.65872	0.91162	1.24573	1.1641	0.81705	0.91189	1.45577	0.7365	0.6614	13	0.9244	0.08549		10.01	0.23505	0.50871	0.39798	0.54445	0.80448	0.89856	0.53235	0.8425	0.49923	0.65794	0.61902	0.62946	0.64608	0.64863	14	0.6046	0.0468		10.162	0.70507	0.84363	1.04749	0.6659	0.83245	0.65596	1.02303	1.41895	0.65101	0.94507	1.32947	0.72941
14.985	0.71544	1.55202	0.6725	1.60593	0.99861	1.25978	1.47724	1.64079	1.03361	1.19647	1.79982	1.12294	0.82034	13	1.22273	0.10278		15.026	0.32615	0.74386	0.40035	0.7529	1.13063	1.24996	0.68689	0.99416	0.67174	0.75009	0.73877	0.71821	0.8647	0.77383	14	0.77159	0.06525		15.014	0.82958	1.03677	1.19645	0.86218	1.0249	0.72971	1.31534	1.75737	0.86729	1.17021	1.7105	1.03161
19.984	0.70084	1.56907	0.66763	1.69918	0.98141	1.14769	1.4479	1.6544	0.94602	1.12494	1.49299	1.00061	0.75239	13	1.16808	0.10188		20.034	0.24266	0.73269	0.43579	0.83073	1.14138	1.31014	0.66415	1.03464	0.5902	0.68198	0.61636	0.67703	0.61751	0.57753	14	0.7252	0.07451		20.007	0.99431	1.07763	1.12353	0.89381	1.08173	0.63943	1.13047	1.62812	0.84132	1.08269	1.68212	1.04686
24.994	0.65603	1.48542	0.64467	1.62385	0.89124	1.06105	1.35679	1.50777	0.89134	0.9767	1.25447	1.02031	0.70346	13	1.08255	0.09292		25.004	0.16799	0.63105	0.33372	0.72319	1.03308	1.18208	0.61967	0.98733	0.48305	0.63561	0.42802	0.62338	0.5764	0.49945	14	0.63743	0.07363		25.014	0.98594	1.04647	1.064	0.8057	0.91932	0.5409	0.99651	1.5379	0.78648	0.96153	1.4899	0.95954
29.973	0.61469	1.38369	0.58446	1.54288	0.86347	0.95856	1.25911	1.46404	0.78607	0.87387	1.1007	1.049	0.64222	13	1.00944	0.09012		30.009	0.25864	0.60108	0.3787	0.75735	1.02282	1.06461	0.57082	0.96413	0.45083	0.59895	0.29245	0.58451	0.56953	0.56754	14	0.62014	0.0676		30.022	0.84856	0.93702	0.96972	0.72613	0.8325	0.47251	0.92294	1.47854	0.72779	0.94092	1.40676	0.90466
34.972	0.5401	1.32654	0.54554	1.43161	0.78215	0.91339	1.15057	1.31199	0.71314	0.66453	0.92079	0.77708	0.57745	13	0.89653	0.08683		35.003	0.30007	0.53155	0.25148	0.71805	1.04041	0.96122	0.5369	0.83548	0.37661	0.54098	0.30948	0.51574	0.46237	0.39217	14	0.55518	0.066		34.99	0.85226	0.93786	0.92907	0.63828	0.74991	0.31086	0.85547	1.29504	0.63467	0.82756	1.268	0.86946
39.977	0.53708	1.13901	0.4993	1.36737	0.76016	0.85609	1.0162	1.16343	0.64779	0.60459	0.81453	0.85072	0.58705	13	0.8341	0.07486		40.01	0.17537	0.44747	0.23752	0.71324	0.87869	0.84057	0.45859	0.82047	0.32478	0.53397	0.17651	0.52063	0.37882	0.4106	14	0.49409	0.064		39.998	0.84703	0.87383	0.84841	0.64112	0.82118	0.34854	0.74079	1.21172	0.61028	0.72602	1.16949	0.77134
44.973	0.47899	1.07453	0.4778	1.28856	0.67184	0.7803	0.87167	1.14347	0.60358	0.55241	0.75246	0.67131	0.46405	13	0.75623	0.07457		45.01	0.16797	0.51792	0.2537	0.60211	0.75207	0.7648	0.41588	0.75812	0.2645	0.48669	0.11353	0.47221	0.35528	0.47311	14	0.45699	0.05696		44.998	0.85277	0.7418	0.85816	0.64931	0.70656	0.44477	0.63355	1.14302	0.59302	0.66341	1.13523	0.73663
49.983	0.46305	0.9901	0.4496	1.26344	0.6221	0.66379	0.78766	1.06961	0.55791	0.43164	0.68721	0.67055	0.53516	13	0.70706	0.07125		50.017	0.17326	0.46064	0.11296	0.61383	0.78836	0.71294	0.39835	0.77603	0.23806	0.45216	0.01953	0.4409	0.37484	0.46508	14	0.4305	0.06379		50.005	0.79084	0.70063	0.75521	0.52284	0.68748	0.35814	0.5707	1.08257	0.48003	0.56396	1.01403	0.66071
54.993	0.46153	0.98521	0.40838	1.28766	0.54566	0.67882	0.77955	0.98638	0.46593	0.40437	0.60726	0.523	0.41023	13	0.65723	0.07694		54.999	0.09944	0.36575	0.17036	0.51344	0.67872	0.70053	0.40307	0.69268	0.21812	0.38062	0.06849	0.37608	0.18011	0.38534	14	0.37377	0.05711		55.013	0.79431	0.70432	0.79264	0.47363	0.60516	0.30651	0.52758	0.99559	0.47363	0.51542	0.91273	0.62707
60.002	0.35624	0.78447	0.39753	1.25256	0.44872	0.56484	0.79449	0.94772	0.45277	0.30197	0.44868	0.71044	0.39081	13	0.60394	0.07731		60.001	0.13781	0.2831	0.16688	0.53201	0.70761	0.65086	0.42283	0.65043	0.15652	0.37258	0.00804	0.36968	0.23779	0.27582	14	0.35514	0.05757		60.02	0.76735	0.589	0.67985	0.49459	0.59721	0.26152	0.47204	1.01459	0.40894	0.44067	0.87573	0.65486
64.971	0.3831	0.79237	0.34046	1.13286	0.32885	0.60429	0.64485	0.88902	0.39321	0.29761	0.52025	0.53081	0.39058	13	0.55756	0.06981		65.006	0.05428	0.21589	0.16023	0.50153	0.6185	0.59653	0.36973	0.5202	0.12623	0.37264	0.01422	0.3571	0.1957	0.29277	14	0.31397	0.05236		65.028	0.71425	0.55868	0.58807	0.43388	0.61982	0.29617	0.44085	0.97988	0.35016	0.36931	0.71559	0.50836
69.985	0.26804	0.72216	0.3293	1.12162	0.35994	0.52216	0.65347	0.84296	0.37031	0.17024	0.47334	0.567	0.32111	13	0.51705	0.07334		70.002	0.04757	0.25401	0.14809	0.48261	0.60752	0.50381	0.4228	0.55018	0.17757	0.28841	-0.11703	0.2846	0.19107	0.2407	14	0.29156	0.05446		69.998	0.76531	0.53219	0.62109	0.38787	0.58433	0.2104	0.457	0.83219	0.38537	0.33251	0.76643	0.46214
74.972	0.26427	0.73351	0.32856	1.02363	0.51975	0.51462	0.52275	0.83646	0.3314	0.20695	0.24101	0.38624	0.32731	13	0.47973	0.06919		75.004	0.0841	0.32994	0.14461	0.46521	0.50732	0.45913	0.38081	0.56049	0.07768	0.27442	-0.04403	0.25819	0.16521	0.24345	14	0.27904	0.04844		75.005	0.78046	0.51923	0.5462	0.38511	0.50564	0.26062	0.36963	0.86439	0.2758	0.24367	0.69313	0.43636
79.98	0.32994	0.67528	0.29808	1.02386	0.46085	0.44207	0.54828	0.78919	0.26999	0.14868	0.27045	0.48798	0.26228	13	0.46207	0.06853		80.012	0.09047	0.39785	0.10381	0.3874	0.531	0.47209	0.32811	0.32522	0.10063	0.2722	-0.09845	0.26652	0.16836	0.19111	14	0.25259	0.04582		80.004	0.70652	0.48783	0.59678	0.45793	0.3956	0.18167	0.38329	0.84883	0.29993	0.20419	0.64779	0.36141
84.988	0.28542	0.62807	0.28018	1.05809	0.43326	0.45476	0.46494	0.79686	0.24455	0.07423	0.20701	0.43677	0.28662	13	0.43467	0.07358		85.019	0.09237	0.15859	0.11284	0.41595	0.41645	0.4234	0.27608	0.39453	0.07523	0.25026	-0.15771	0.23423	0.06524	0.3143	14	0.21941	0.04576		85.005	0.74185	0.379	0.62987	0.36193	0.4248	0.23275	0.33538	0.75625	0.27268	0.25066	0.67306	0.30698
89.991	0.24497	0.54345	0.2968	0.96762	0.23064	0.44155	0.45097	0.71891	0.21574	0.06063	0.29838	0.36019	0.24591	13	0.39044	0.06678		90.027	0.02405	0.08133	0.12077	0.39444	0.49792	0.36962	0.24593	0.49091	0.06228	0.25448	-0.09206	0.23264	0.04367	0.20808	14	0.20958	0.04832		90.033	0.69331	0.36721	0.56791	0.40776	0.49182	0.15221	0.3231	0.76631	0.24914	0.11939	0.55044	0.20971
94.971	0.1751	0.52272	0.27542	0.98697	0.31588	0.41533	0.42634	0.7108	0.20674	-0.00335	0.13426	0.40254	0.16729	13	0.36431	0.07332		95.003	0.1276	0.1509	0.03628	0.36247	0.41333	0.47379	0.31995	0.41679	0.02455	0.21546	-0.05726	0.20811	0.07025	0.19903	14	0.21152	0.04416		95.026	0.66974	0.34666	0.57936	0.41483	0.55295	0.1821	0.28841	0.70976	0.16662	0.18577	0.53835	0.24007
100.12	0.21411	0.5182	0.21179	0.92347	0.35235	0.3191	0.42195	0.65419	0.16686	0.01675	0.18438	0.32303	0.2012	13	0.34672	0.06642		100.007	0.12232	0.25218	-0.00774	0.39794	0.41353	0.39718	0.2858	0.36989	0.04297	0.24869	-0.17029	0.22852	0.07899	0.074	14	0.19528	0.04729		99.998	0.64399	0.3631	0.51193	0.42805	0.43485	0.16105	0.30594	0.70947	0.18568	0.05591	0.52174	0.23107
104.969	0.1308	0.50274	0.21992	0.89762	0.34665	0.34422	0.33053	0.65697	0.15032	-0.00358	0.19406	0.27687	0.23243	13	0.3292	0.06629		105.004	0.06242	0.24372	0.06189	0.41061	0.38941	0.41726	0.2735	0.38384	0.05272	0.17917	-0.13886	0.17669	0.09858	0.14912	14	0.19715	0.04428		105.005	0.66295	0.28057	0.47709	0.274	0.42989	0.12422	0.27276	0.63886	0.19996	-0.05845	0.503	0.26098
109.976	0.13936	0.4292	0.18509	0.91871	0.29086	0.28568	0.36232	0.6237	0.08006	-0.0578	0.12821	0.27826	0.16165	13	0.29425	0.07037		110.009	0.11824	0.2713	0.06296	0.34487	0.38305	0.41605	0.26025	0.37617	0.04441	0.18344	-0.21571	0.17307	0.12838	0.03929	14	0.1847	0.04641		109.997	0.59391	0.24902	0.66156	0.1843	0.421	0.19654	0.19698	0.63238	0.10702	-0.03043	0.47667	0.22514
115.106	0.17543	0.43637	0.19159	0.86904	0.25859	0.33338	0.29556	0.60504	0.09391	-0.06398	0.2357	0.34004	0.17611	13	0.3036	0.06512		115.012	0.07769	0.19533	0.02267	0.33712	0.2867	0.40852	0.25158	0.32939	0.04518	0.15261	-0.16686	0.13475	0.07295	0.03415	14	0.15584	0.04174		115.004	0.57974	0.2112	0.50022	0.19818	0.29677	0.15446	0.22207	0.58708	0.12227	-0.00193	0.44189	0.11537
119.989	0.13833	0.31877	0.15726	0.94976	0.29906	0.30616	0.30284	0.58999	0.10044	-0.08558	0.07385	0.30545	0.18061	13	0.27976	0.07169		120.031	0.06163	0.10393	0.07469	0.33664	0.30944	0.35016	0.30609	0.37589	-0.00706	0.15129	-0.18303	0.13868	0.01698	0.09754	14	0.15235	0.04369		120.002	0.57585	0.1529	0.44063	0.22245	0.34758	0.15857	0.27563	0.5205	0.09251	-0.10431	0.41131	0.0733
124.989	0.14921	0.33519	0.16262	0.88692	0.28131	0.25944	0.30938	0.59773	0.06939	-0.04197	0.05329	0.40991	0.15777	13	0.27925	0.06868		125.034	0.0773	0.09232	0.05772	0.33673	0.33342	0.30245	0.222	0.23453	-0.03853	0.15118	-0.25495	0.13504	0.06324	0.06007	14	0.12661	0.04251		125.012	0.58218	0.15055	0.54171	0.15281	0.34227	0.1767	0.19367	0.46559	0.11135	0.20922	0.36585	0.02749
130.115	0.09542	0.25907	0.16396	0.80062	0.11724	0.31498	0.24369	0.53451	0.06654	-0.10567	0.02575	0.19233	0.16067	13	0.2207	0.06445		130.003	-0.01021	0.19242	0.05175	0.32519	0.38253	0.35995	0.19808	0.29052	-0.02535	0.11631	-0.2553	0.11702	0.0798	0.06196	14	0.13462	0.04656		130.017	0.6157	0.16621	0.37604	0.18408	0.2814	0.17674	0.14562	0.36028	0.1116	0.22285	0.3209	0.05285
134.966	0.08728	0.38993	0.10218	0.84974	0.1834	0.21106	0.26496	0.52392	0.02994	-0.11086	0.07818	0.28856	0.17779	13	0.23662	0.068		135.01	0.05619	0.21082	0.08638	0.29419	0.25607	0.36745	0.15069	0.15853	-0.02561	0.13195	-0.19359	0.10108	0.07982	0.07837	14	0.12517	0.03699		135.025	0.56686	0.15362	0.41365	0.15434	0.33883	0.1546	0.18203	0.4289	0.02447	0.16802	0.37683	0.06019
139.967	0.08856	0.23723	0.072	0.7597	0.15498	0.2631	0.24081	0.52935	0.04786	-0.14163	0.0992	0.2179	0.13682	13	0.20815	0.06269		140.015	0.10693	0.06728	0.02116	0.29273	0.23283	0.28479	0.19474	0.18778	-0.06633	0.14015	-0.24758	0.11075	-0.03006	-0.01461	14	0.09147	0.04007		139.993	0.53121	0.1443	0.45233	0.24252	0.3344	0.16857	0.13737	0.39539	-0.00293	0.19985	0.29711	0.04374
145.125	0.10897	0.25447	0.04477	0.77857	0.29841	0.25388	0.22165	0.48914	0.00825	-0.17872	0.04431	0.3151	0.08688	13	0.20967	0.0668		145.01	0.10791	0.10985	0.02133	0.29556	0.2053	0.31586	0.17011	0.25876	-0.051	0.07471	-0.17156	0.07029	-0.02553	0.04123	14	0.10163	0.03704		145.002	0.52573	0.11795	0.40859	0.27747	0.27374	0.2451	0.16955	0.34251	-0.00875	0.16452	0.30394	0.12602
149.978	0.09298	0.22621	0.03251	0.76082	0.10507	0.26678	0.19377	0.48984	-0.00914	-0.09754	0.06054	0.15908	0.11243	13	0.1841	0.06253		150.014	0.03909	0.19219	0.01452	0.22856	0.30807	0.26681	0.11716	0.16271	-0.12959	0.0598	-0.21048	0.04675	-0.01623	-0.01335	14	0.07614	0.03946		150.001	0.52196	0.1009	0.38099	0.24752	0.3427	0.15683	0.11776	0.40616	-0.02171	0.24573	0.29998	0.03222
154.988	0.0952	0.22054	0.03089	0.72992	0.18877	0.19801	0.18567	0.45519	0.04942	-0.14636	0.05859	0.25338	0.12791	13	0.18824	0.05966		155.033	0.18588	0.0373	-0.000605037	0.25025	0.20819	0.29803	0.06282	0.18994	-0.07008	0.07363	-0.21795	0.05807	0.04105	0.02806	14	0.08176	0.03638		155.008	0.50121	0.11954	0.44884	0.20132	0.28641	0.12281	0.12769	0.42801	0.01392	0.12717	0.31514	0.00369
160.114	0.07822	0.19545	0.01567	0.78302	0.27631	0.24479	0.23926	0.47433	0.00594	-0.14864	0.08446	0.28556	0.04348	13	0.1983	0.06591		160.002	0.01234	-0.01321	-0.01203	0.21707	0.12099	0.23686	0.14701	0.27788	-0.11091	0.00973	-0.22667	0.00824	0.01648	-0.04828	14	0.04539	0.03741		160.016	0.49009	0.08512	0.4306	0.16438	0.38181	0.1694	0.11984	0.32724	-0.02797	0.16955	0.24757	-0.04169
164.966	0.05721	0.26883	-0.01118	0.74724	0.16885	0.23818	0.23577	0.47312	0.00371	-0.15684	-0.01035	0.28106	0.11057	13	0.18509	0.0655		165.006	-0.04581	0.12051	0.03014	0.22383	0.23027	0.20956	0.1941	0.23411	-0.08793	0.02916	-0.27561	0.01215	0.000605718	-0.14761	14	0.05196	0.0423		165.023	0.45441	0.12346	0.33019	0.17766	0.30157	0.21862	0.13187	0.30677	-0.0696	0.09084	0.28312	0.000603515
169.968	0.04338	0.17017	0.00541	0.72886	0.1692	0.14754	0.15338	0.39557	-0.03395	-0.1809	0.00515	0.19604	0.09491	13	0.14575	0.0619		170.01	0.07838	0.09843	-0.01348	0.23466	0.15591	0.23828	0.10942	0.20196	-0.10232	0.05518	-0.19835	0.0376	0.00535	0.04827	14	0.06781	0.03292		169.992	0.53912	0.11119	0.3726	0.16446	0.39092	0.12775	0.1094	0.31369	-0.08676	0.16199	0.23153	-0.07966
174.968	-0.000455791	0.25227	0.00246	0.71583	0.15966	0.14646	0.16709	0.37272	-0.00944	-0.18194	-0.01514	0.1354	0.07352	13	0.13988	0.06164		175.014	0.11528	0.03167	-0.08652	0.24481	0.08756	0.18024	0.11732	0.10444	-0.14583	-0.0214	-0.24533	-0.02743	0.00738	-0.1357	14	0.01618	0.03662		174.999	0.47308	0.10178	0.38023	0.24339	0.2889	0.14719	0.12183	0.24037	-0.0543	0.14892	0.24895	-0.09078
179.969	0.03693	0.21982	0.02194	0.69477	0.12302	0.19312	0.12333	0.38557	-0.01724	-0.13813	0.04071	0.13961	0.03011	13	0.14258	0.05809		180.011	-0.0082	0.00995	0.03778	0.23212	0.17035	0.1511	0.06521	0.1599	-0.06627	-0.02286	-0.09495	-0.02301	0.00832	-0.08403	14	0.03824	0.02756		179.993	0.53156	0.12618	0.36735	0.32187	0.36124	0.15194	0.1139	0.31338	-0.09501	0.19954	0.26046	-0.0908
Panel g			Units = DF/F0
Peak sypHy signal		Measured at t~=15 sec in panel f (end of stimulation, image #9)														Shapiro-Wilk Normality Test							t-test SynIa -/+ hasyn								t-test SynIb -/+ hasyn								t-test Sunapsin Iia/-+ hasyn								t-test Sunapsin Iib/-+ hasyn
SynIa	SynIa+hasyn		SynIb	SynIb+hasyn		SynIIa	SynIIa+hasyn		SynIIB	SynIIb+hasyn		SynIIIa	SynIIIa+hasyn			Normality Test (25/12/2022 15:34:18)							Two sample t Test (25/12/2022 15:15:39)								Two sample t Test (25/12/2022 15:18:03)								Two sample t Test (25/12/2022 15:26:29)								Two sample t Test (25/12/2022 15:28:39)
0.71544	0.32615		0.82958	1.60701		1.45386	0.372		1.17697	0.91236		0.76092	0.72063			NormalityTest							Descriptive Statistics								Descriptive Statistics								Descriptive Statistics								Descriptive Statistics
1.55202	0.74386		1.03677	1.20134		0.6324	0.4287		1.60301	1.46179		0.88549	0.68007			Shapiro-Wilk									N	Mean	SD	SEM	Median				N	Mean	SD	SEM	Median				N	Mean	SD	SEM	Median				N
0.6725	0.40035		1.19645	1.04104		1.01501	0.41623		1.49168	0.8332		0.44153	0.77417				DF	Statistic	p-value	Decision at level(5%)			SynIa		13	1.22273	0.37057	0.10278	1.19647		SynIb		14	1.07275	0.33537	0.08963	1.02826		SynIIa		10	1.13987	0.24687	0.07807	1.14354		SynIIb		13
1.60593	0.7529		0.86218	0.64576		1.24947	1.06692		0.93544	1.27999		1.59017	0.97658			SynIa	13	0.95102	0.6138	Can't reject normality			SynIa aSyn		14	0.77159	0.24414	0.06525	0.74698		SynIb aSyn		11	1.00699	0.32782	0.09884	1.00425		SynIIa aSyn		12	0.55918	0.27629	0.07976	0.45356		SynIIb aSyn		13
0.99861	1.13063		1.0249	0.50553		1.35753	0.37089		0.49989	1.04125		1.02256	1.33591			SynIa aSyn	14	0.92545	0.26313	Can't reject normality				Difference		0.45114		0.1199				Difference		0.06576		0.13381				Difference		0.58069		0.11281				Difference	13
1.25978	1.24996		0.72971	1.14086		1.05969	0.63055		0.70965	1.39143		2.3486	1.47631			SynIb	14	0.89179	0.08579	Can't reject normality				Overall	27	0.9888	0.38203	0.07352	0.8647			Overall	25	1.04381	0.32682	0.06536	1.0249			Overall	22	0.82313	0.39203	0.08358	0.94251			Overall	26
1.47724	0.68689		1.31534	1.42698		0.95364	0.47841		1.30859	0.98771		1.96907	1.18151			SynIb aSyn	11	0.98273	0.97944	Can't reject normality			t-Test Statistics								t-Test Statistics								t-Test Statistics								t-Test Statistics
1.64079	0.99416		1.75737	0.75287		1.22635	0.94383		1.04531	1.07577		1.44359	1.21969			SynIIa	10	0.94037	0.55718	Can't reject normality				t Statistic	DF	Prob>|t|						t Statistic	DF	Prob>|t|						t Statistic	DF	Prob>|t|						t Statistic	DF
1.03361	0.67174		0.86729	0.88812		1.06074	0.21718		0.53979	0.70968		1.34336	0.80394			SynIIa aSyn	12	0.86252	0.05258	Can't reject normality			Equal Variance Assumed	3.76258	25	0.000909203					Equal Variance Assumed	0.49143	23	0.62778					Equal Variance Assumed	5.14762	20	4.89978e-05					Equal Variance Assumed	0.00398	24
1.19647	0.75009		1.17021	1.00425		1.39001	0.5056		0.89288	0.83168		1.55807	1.1677			SynIIb	13	0.9561	0.69283	Can't reject normality			Equal Variance NOT Assumed (Welch Correction)	3.70578	20.542	0.00135					Equal Variance NOT Assumed (Welch Correction)	0.49284	21.8455	0.62704					Equal Variance NOT Assumed (Welch Correction)	5.20298	19.876	4.40167e-05					Equal Variance NOT Assumed (Welch Correction)	0.00398	18.9135
1.79982	0.73877		1.7105	0.8631			0.94118		0.63546	0.92302		1.48134	1.01518			SynIIb aSyn	13	0.96843	0.8749	Can't reject normality
1.12294	0.71821		1.03161				0.33868		1.73645	1.21637		1.83541	1.18755			SynIIIa	26	0.96572	0.51622	Can't reject normality
0.82034	0.8647		0.8363						1.28024	1.1844		1.30837	0.84573			SynIIIa aSyn	26	0.96784	0.56825	Can't reject normality
	0.77383		0.65023									0.9922	0.27564
												0.9922	1.29803
												0.89663	0.4399
												0.79543	1.0981
												1.09654	0.29698
												1.06011	0.64654
												1.38421	0.61261
												0.67327	0.86001
												0.92901	1.41032
												1.09241	0.54834
												1.92339	1.03201
												1.54273	0.70068
												1.07819	1.21835
[truncated: 144 more columns]
