# Supplementary material for: Synapsin E-domain is essential for α-synuclein function
Source: eLife. 2024 May 7;12:RP89687. doi: 10.7554/eLife.89687 (PMC11076041; doi:10.7554/eLife.89687)
Supplement: Figure 2—source data 1. [file elife-89687-fig2-data1.xlsx]

## Sheet: Figure 2
Panel c
Densitometry Ratio Synapsin isoforms
Synapsin Ia	Synapsin Ib	Synapsin IIa	Synapsin IIb	Synapsin IIIa		Shapiro-Wilk							Two sample t-Test			SynIa vs SynIb					Two sample t-Test			SynIIa vs SynIIb
1.31536	0.681865	1.44917	0.350217	1.34413
1.2031	0.299453	1.73534	0.0100526	1.52989		Normality Test (26/11/2023 14:47:57)							Two sample t Test (26/11/2023 14:54:13)								Two sample t Test (26/11/2023 14:54:52)
0.890803	0.431417	1.34316	0.0116625	1.4151		NormalityTest							Descriptive Statistics								Descriptive Statistics
0.754873	0.177295	0.887754	0.209822	0.972061		Shapiro-Wilk									N	Mean	SD	SEM	Median				N	Mean	SD	SEM	Median
0.825794	0.501437	1.03443	0.459234	1.96055			DF	Statistic	p-value	Decision at level(5%)			Synapsin Ia		5	0.99799	0.2465	0.11024	0.8908		Synapsin IIa		5	1.28997	0.33675	0.1506	1.34316
						Synapsin Ia	5	0.88427	0.32912	Can't reject normality			Synapsin Ib		5	0.41829	0.19285	0.08624	0.43142		Synapsin IIb		5	0.2082	0.20067	0.08974	0.20982
						Synapsin Ib	5	0.9918	0.98561	Can't reject normality				Difference	5	0.57969		0.13996	0.57758			Difference	5	1.08178		0.17531	1.09895
						Synapsin IIa	5	0.97034	0.87745	Can't reject normality				Overall	10	0.70814	0.36997	0.117	0.71837			Overall	10	0.74909	0.62719	0.19833	0.67349
						Synapsin IIb	5	0.89767	0.39714	Can't reject normality			t-Test Statistics								t-Test Statistics
						Synapsin IIIa	5	0.9701	0.87592	Can't reject normality				t Statistic	DF	Prob>|t|						t Statistic	DF	Prob>|t|
													Equal Variance Assumed	4.14172	8	0.00325					Equal Variance Assumed	6.17057	8	0.000267895
													Equal Variance NOT Assumed (Welch Correction)	4.14172	7.5621	0.00367					Equal Variance NOT Assumed (Welch Correction)	6.17057	6.52273	0.000604194
Panel g
Normalized densitometry hasyn fragments
GST		hasyn(1-140)		hasyn(1-95)		hasyn(1-110)		hasyn(96-140)		hasyn(Scr:96-140)		hasyn(Scr:96-110)			One-way ANOVA							Tukey's posthoc analysis										Grouping letters
0.00389		1		0.00147		0.81988		0.81414		0.02538		0.00136
0.03963		1		0.01698		1.36342		1.68069		0.12466		0.16068				DF	Sum of Squares	Mean Square	F Value	Prob>F						MeanDiff	SEM	q Value	Prob	Alpha	Sig	LCL	UCL				Mean	Groups	Groups
0		1		0.0038		0.55588		0.93027		0.02009		0.0049			Model	6	5.07264	0.84544	14.6815	2.54354e-05		hasyn(1-140) GST				0.98549	0.19593	7.11308	0.0027	0.05	1	0.31646	1.65452		hasyn(96-140)		1.1417	A
															Error	14	0.80619	0.05759				hasyn(1-95) GST				-0.00709	0.19593	0.05118	1	0.05	0	-0.67612	0.66194		hasyn(1-140)		1	A
															Total	20	5.87883					hasyn(1-95) hasyn(1-140)				-0.99258	0.19593	7.16427	0.00253	0.05	1	-1.66162	-0.32355		hasyn(1-110)		0.91306	A
																						hasyn(1-110) GST				0.89855	0.19593	6.48556	0.00598	0.05	1	0.22952	1.56758		hasyn(Scr:96-140)		0.05671		B
																						hasyn(1-110) hasyn(1-140)				-0.08694	0.19593	0.62752	0.9992	0.05	0	-0.75597	0.58209		hasyn(Scr:96-110)		0.05565		B
																						hasyn(1-110) hasyn(1-95)				0.90564	0.19593	6.53675	0.0056	0.05	1	0.23661	1.57468		GST		0.01451		B
																						hasyn(96-140) GST				1.12719	0.19593	8.13586	0.000764341	0.05	1	0.45816	1.79623		hasyn(1-95)		0.00742		B
																						hasyn(96-140) hasyn(1-140)				0.1417	0.19593	1.02278	0.98864	0.05	0	-0.52733	0.81074
																						hasyn(96-140) hasyn(1-95)				1.13428	0.19593	8.18704	0.00071867	0.05	1	0.46525	1.80332
																						hasyn(96-140) hasyn(1-110)				0.22864	0.19593	1.65029	0.89533	0.05	0	-0.44039	0.89768
																						hasyn(Scr:96-140) GST				0.0422	0.19593	0.3046	0.99999	0.05	0	-0.62683	0.71123
																						hasyn(Scr:96-140) hasyn(1-140)				-0.94329	0.19593	6.80848	0.00396	0.05	1	-1.61232	-0.27426
																						hasyn(Scr:96-140) hasyn(1-95)				0.04929	0.19593	0.35578	0.99997	0.05	0	-0.61974	0.71833
																						hasyn(Scr:96-140) hasyn(1-110)				-0.85635	0.19593	6.18096	0.00883	0.05	1	-1.52538	-0.18732
																						hasyn(Scr:96-140) hasyn(96-140)				-1.08499	0.19593	7.83126	0.00111	0.05	1	-1.75403	-0.41596
																						hasyn(Scr:96-110) GST				0.04114	0.19593	0.29693	0.99999	0.05	0	-0.62789	0.71017
																						hasyn(Scr:96-110) hasyn(1-140)				-0.94435	0.19593	6.81615	0.00392	0.05	1	-1.61339	-0.27532
																						hasyn(Scr:96-110) hasyn(1-95)				0.04823	0.19593	0.34811	0.99997	0.05	0	-0.6208	0.71726
																						hasyn(Scr:96-110) hasyn(1-110)				-0.85741	0.19593	6.18863	0.00875	0.05	1	-1.52645	-0.18838
																						hasyn(Scr:96-110) hasyn(96-140)				-1.08605	0.19593	7.83893	0.0011	0.05	1	-1.75509	-0.41702
																						hasyn(Scr:96-110) hasyn(Scr:96-140)				-0.00106	0.19593	0.00767	1	0.05	0	-0.6701	0.66797
