# Supplementary material for: Synapsin E-domain is essential for α-synuclein function
Source: eLife. 2024 May 7;12:RP89687. doi: 10.7554/eLife.89687 (PMC11076041; doi:10.7554/eLife.89687)
Supplement: Figure 3—figure supplement 1—source data 1. [file elife-89687-fig3-figsupp1-data1.xlsx]

## Sheet: Figure 3 Fig Suppl 1
Panel C			SynIa SynIaScrE average synaptic fluorescence							Arbitrary units
SynIa	SynIaScrE	SynIa+hasyn	SynIaScrE+hasyn			Shapiro Wilk normality test							One-way ANOVA								Tukey's posthoc analysis
0.9722	0.74781	0.72296	1.03259			Normality Test (03/09/2023 15:12:45)							ANOVAOneWay (24/11/2023 13:54:40)								hasyn	syn	hasyn	syn	MeanDiff	SEM	q Value	Prob	Alpha	Sig	LCL	UCL
1.22389	0.76347	0.80156	1.07253				DF	Statistic	p-value	Decision at level(5%)			Descriptive Statistics								ctl	SynIaScrE	ctl	SynIa	-0.05832	0.05252	1.5704	0.68464	0.05	0	-0.19731	0.08067
0.8454	0.66734	0.85153	0.84649			SynIa	15	0.94755	0.48671	Can't reject normality					N Analysis	N Missing	Mean	Standard Deviation	SE of Mean		hasyn	SynIa	ctl	SynIa	-0.07247	0.05252	1.95132	0.51703	0.05	0	-0.21146	0.06652
0.88777	0.67417	0.80243	1.00588			SynIaScrE	15	0.89989	0.09481	Can't reject normality			ctl	SynIa	15	3	1	0.11496	0.02968		hasyn	SynIa	ctl	SynIaScrE	-0.01415	0.05252	0.38092	0.99309	0.05	0	-0.15314	0.12484
1.07073	0.90056	0.97839	0.77703			SynIa+hasyn	15	0.94968	0.51936	Can't reject normality			ctl	SynIaScrE	15	3	0.94168	0.18881	0.04875		hasyn	SynIaScrE	ctl	SynIa	0.05371	0.05169	1.46949	0.72734	0.05	0	-0.08309	0.19051
0.96057	1.12642	1.07953	1.07993			SynIaScrE+hasyn	16	0.89679	0.07141	Can't reject normality			hasyn	SynIa	15	3	0.92753	0.14674	0.03789		hasyn	SynIaScrE	ctl	SynIaScrE	0.11203	0.05169	3.06501	0.14485	0.05	0	-0.02477	0.24883
1.14855	1.14843	0.93937	1.19987										hasyn	SynIaScrE	16	2	1.05371	0.11361	0.0284		hasyn	SynIaScrE	hasyn	SynIa	0.12618	0.05169	3.45203	0.08081	0.05	0	-0.01062	0.26298
1.1445	0.96635	0.77166	1.11726										Overall ANOVA
0.87319	0.73646	0.75844	1.15415											DF	Sum of Squares	Mean Square	F Value	Prob>F
0.87319	0.95829	0.96057	1.07942										Model	3	0.15602	0.05201	2.51405	0.06744
1.03283	1.03349	0.96416	1.06833										Error	57	1.17915	0.02069
0.94875	0.90459	0.89124	0.99276										Total	60	1.33517
1.06278	1.18674	1.16728	1.01032
1.03833	1.15308	1.19661	1.11898
0.91731	1.15801	1.02727	1.20101
			1.10286
