# Supplementary material for: Synapsin E-domain is essential for α-synuclein function
Source: eLife. 2024 May 7;12:RP89687. doi: 10.7554/eLife.89687 (PMC11076041; doi:10.7554/eLife.89687)
Supplement: Figure 3—figure supplement 2—source data 1. [file elife-89687-fig3-figsupp2-data1.xlsx]

## Sheet: Figure 3 Fig Suppl 2
Panel C	tagBFP vs tagBFP-E in TKO neurons				Units = DF/F0
Normalized and background-subtracted sypHy fluorescence as a function of time (in seconds). Field stimulation of a duration of 15 sec at 20Hz starts at t=0 (image #6).
tagBFP																						tagBFP+hasyn																							TagBFP:E-domain
Time	*	*	*	*	*	*	*	*	*	*	*	*						N	Mean	SEM		Time	*	*	*	*	*	*	*	*	*	*	*	*											Time
-24.981	0.00683	-0.05317	-0.0023	-0.01404	0.03209	0.01257	-0.01763	-0.03666	0.0345	-0.04142	-0.02588	-0.02202	-0.13256	-0.00789	-0.01181	-0.03028	-0.01912	17	-0.01934	0.00913		-25.071	-0.00597	-0.049	-0.0089	0.00177	0.00485	0.00871	-0.00558	0.02456	-0.04175	-0.01706	0.02371	-0.00612	0.00804	0.05715	0.04805	0.00718	-0.01001	0.07321	18	0.00627	0.00731		-23.234	0.000135092	0.06391	-0.03494	0.11079
-19.993	0.03038	-0.05557	-0.02604	-0.00397	0.01207	0.00407	0.000115626	-0.00337	-0.0417	0.03982	0.02175	-0.01456	-0.12332	-0.00866	0.00224	-0.02773	0.02719	17	-0.00984	0.0094		-20.068	0.00482	-0.00394	-0.01475	-0.02834	-0.00857	-0.03124	-0.02552	-0.04348	0.000634644	0.00505	-0.0124	-0.02197	0.000597359	-0.01051	-0.02215	-0.00569	0.04365	-0.04873	18	-0.01236	0.00494		-19.991	-0.00133	-0.01645	-0.2435	0.00334
-14.988	0.0098	0.01317	0.02615	-0.04827	-0.01087	-0.04579	-0.00192	0.0044	0.0116	-0.0185	-0.03116	0.03083	-0.04056	0.01187	0.07336	-0.00872	-0.02045	17	-0.00265	0.00754		-15.06	-0.00322	-0.01872	-0.00403	0.02541	0.01132	-0.01262	-0.01748	0.06603	0.01937	0.00118	-0.02021	-0.02897	-0.00793	-0.01195	-0.0172	-0.02211	0.03171	0.01584	18	0.000356026	0.00567		-14.998	0.04238	-0.00393	0.05346	0.09632
-9.98	0.03353	0.03945	-0.01341	0.02254	-0.00704	-0.02941	0.01553	-0.0257	-0.02834	-0.000855612	0.01864	0.00709	0.17024	-0.00253	-0.01078	0.04536	-0.00177	17	0.01368	0.01124		-10.045	-0.00137	0.05195	-0.01291	-0.01498	-0.03306	-0.01447	0.02799	0.00829	0.007	0.00663	-0.02383	0.07611	-0.01143	-0.03731	-0.00226	0.02299	0.00432	-0.07052	18	-0.000937857	0.00782		-9.94	-0.00507	0.03231	0.09706	-0.03684
-4.998	-0.03717	0.02878	0.01951	0.00482	0.01582	0.05135	-0.01049	0.000972697	0.02394	0.02096	0.01665	-0.00134	0.1262	0.00722	-0.053	0.02138	0.01415	17	0.01469	0.00913		-5.037	0.0169	-0.0226	0.00223	-0.01777	0.02112	-0.01101	0.01051	-0.01569	0.02621	0.0042	0.03273	-0.01906	0.01073	0.00262	-0.00643	-0.00237	-0.06966	0.0302	18	-0.000396254	0.00575		-4.998	-0.03611	-0.07584	0.12792	-0.17361
0	0.428	0.02734	0.36026	0.03893	-0.04206	0.00721	0.01439	0.06036	0.01648	-0.02703	-0.00521	-0.04372	0.18194	0.00798	0.01263	0.00941	0.0524	17	0.06467	0.03259		-0.071	-0.01116	0.0423	0.03835	0.03391	0.00434	0.06063	0.01008	-0.03969	-0.01146	-0.02653	-0.06927	0.04803	0.02123	-0.01665	0.01984	0.00798	0.00127	-0.02576	18	0.00486	0.00794		0	-0.05543	0.01912	-0.03766	-0.10994
5.006	0.97097	0.52373	0.79179	0.32334	0.33663	0.55188	0.91591	1.05457	0.54619	0.42254	0.12417	0.34201	0.81294	0.47216	0.48016	0.37483	0.42122	17	0.55677	0.06328		4.978	0.30805	0.41288	0.5212	0.33973	0.40157	0.48377	0.72229	0.92062	0.8063	0.32733	0.31839	0.37114	0.41067	0.67153	0.83228	0.33533	0.43722	0.484	18	0.50579	0.04639		5.222	0.37966	0.62838	0.81546	0.68898
10	1.20854	0.93671	0.9603	0.54835	0.59864	0.88577	1.49113	1.74291	0.82885	0.66322	0.34527	0.61822	1.32074	0.69967	0.74366	0.69059	0.62435	17	0.87688	0.08943		9.931	0.57846	0.82297	1.06716	0.63026	1.03346	0.96473	1.27611	1.7913	1.25775	0.62981	0.53001	0.52334	0.70291	1.05415	1.42435	0.50477	0.7357	0.83857	18	0.90921	0.08422		10.203	0.58214	0.97824	1.04571	1.21332
15.007	1.2672	1.17038	0.92492	0.7326	0.77585	1.11114	1.67624	2.19548	0.96358	0.74052	0.45868	0.754	1.50604	0.83195	0.95471	0.81692	0.79817	17	1.0399	0.10294		14.938	0.80407	1.18711	1.41488	0.8182	1.31912	1.28914	1.65493	2.29156	1.57122	0.80028	0.67555	0.72956	0.85811	1.26053	1.69353	0.63154	0.84903	0.93472	18	1.15462	0.10552		15.202	0.82192	1.07162	1.43969	1.27107
20.012	1.03739	1.07739	0.80274	0.70366	0.8385	1.20676	1.54369	2.15627	0.81607	0.69201	0.52555	0.82051	1.36898	0.72805	0.89905	0.70147	0.6366	17	0.97381	0.09873		19.938	0.84916	1.13058	1.35159	0.76134	1.29947	1.32153	1.71385	2.26751	1.48165	0.80174	0.66211	0.65391	0.78153	1.17412	1.48688	0.59364	0.75822	0.85503	18	1.10799	0.10517		20.235	0.72493	1.16093	1.25328	1.29226
25.02	1.05914	0.95528	0.63428	0.68005	0.68685	1.13348	1.37242	2.01319	0.70342	0.58422	0.50919	0.83564	1.12385	0.57381	0.84338	0.60965	0.55601	17	0.87493	0.09308		24.946	0.75283	1.01357	1.18648	0.69458	1.19225	1.06046	1.56644	2.08541	1.30452	0.76611	0.46628	0.63713	0.694	1.10508	1.17377	0.50193	0.60232	0.7521	18	0.97529	0.09709		25.201	0.71678	0.99644	1.05114	1.10469
30.004	0.92694	0.83392	0.57692	0.529	0.60897	0.9892	1.30052	1.89186	0.5453	0.47801	0.47032	0.69424	1.03293	0.48655	0.73659	0.43562	0.50405	17	0.76711	0.092		29.954	0.70922	0.92325	1.08395	0.59492	1.03399	0.98825	1.45616	1.98993	1.15916	0.71383	0.35384	0.57216	0.58345	0.98506	0.91285	0.45469	0.43134	0.6807	18	0.86815	0.0948		30.202	0.58258	0.93196	0.8821	0.95578
35.002	0.97369	0.72665	0.54273	0.50297	0.56516	1.01693	1.27156	1.74115	0.4779	0.43355	0.42398	0.6943	0.73176	0.38046	0.69134	0.4176	0.39965	17	0.70537	0.08865		34.961	0.62336	0.88443	0.99975	0.5484	1.05103	0.92843	1.38258	1.80852	1.02084	0.62006	0.34737	0.54455	0.5173	0.89257	0.77948	0.37845	0.36827	0.49082	18	0.78812	0.08993		35.201	0.52441	0.80252	0.83311	0.66274
40.003	0.87275	0.71494	0.49604	0.42355	0.57002	0.94039	1.1746	1.63335	0.37463	0.33373	0.37022	0.57348	0.65079	0.27402	0.57879	0.26702	0.34735	17	0.62327	0.08775		39.93	0.59625	0.8701	0.9727	0.55491	0.8904	0.79709	1.25615	1.71265	0.93631	0.58995	0.28105	0.45087	0.42531	0.75601	0.58556	0.32093	0.26803	0.38175	18	0.70256	0.08753		40.201	0.43376	0.69406	0.70817	0.62868
45.004	0.84756	0.6466	0.44087	0.41295	0.54234	0.81474	1.13545	1.49696	0.29457	0.28035	0.34023	0.57755	0.57458	0.25618	0.56323	0.18844	0.28159	17	0.57024	0.08366		44.938	0.55498	0.77078	0.83229	0.48614	0.80236	0.78598	1.14264	1.55388	0.8362	0.55078	0.16561	0.4093	0.36802	0.7408	0.47979	0.3102	0.18273	0.3898	18	0.63124	0.08153		45.202	0.44428	0.73546	0.74823	0.50866
50.003	0.85634	0.48882	0.43422	0.33972	0.47176	0.75815	1.05983	1.45006	0.20281	0.29156	0.31761	0.51861	0.46136	0.1509	0.57782	0.16876	0.17112	17	0.51291	0.08468		49.937	0.544	0.76343	0.82756	0.47819	0.69292	0.67755	1.05116	1.36412	0.77045	0.50621	0.18138	0.39055	0.31862	0.65749	0.37941	0.24936	0.11017	0.30696	18	0.57053	0.07497		50.202	0.34797	0.58543	0.5085	0.40064
55.011	0.77208	0.47652	0.42898	0.32881	0.52842	0.77062	1.06513	1.34156	0.21276	0.1721	0.31122	0.49953	0.47686	0.12651	0.50662	0.12385	0.15834	17	0.48823	0.08207		54.945	0.48285	0.7568	0.68369	0.41763	0.7049	0.55978	0.96623	1.33632	0.7869	0.46461	0.14784	0.38953	0.26758	0.58029	0.2497	0.2295	0.11152	0.25736	18	0.52183	0.07424		55.202	0.34794	0.63634	0.4742	0.24599
60.021	0.74563	0.49234	0.38029	0.27334	0.44304	0.76336	0.95929	1.29712	0.15091	0.19317	0.30081	0.33889	0.42651	0.07376	0.47573	0.04669	0.11706	17	0.43988	0.08146		59.952	0.44139	0.65851	0.69127	0.46371	0.70736	0.43125	0.92507	1.24513	0.65442	0.456	0.17755	0.29986	0.23695	0.55801	0.15861	0.1985	-0.00731	0.16491	18	0.47006	0.07351		60.203	0.28353	0.44779	0.4732	0.35506
65.001	0.62065	0.42512	0.32591	0.14834	0.44754	0.71397	0.86905	1.20616	0.05901	0.19424	0.2604	0.35778	0.39699	0.03072	0.49254	0.03164	0.13531	17	0.39502	0.07715		64.96	0.43511	0.62654	0.61105	0.38031	0.56477	0.41157	0.90445	1.10651	0.60761	0.38832	0.06855	0.37507	0.19177	0.4848	0.14779	0.15634	-0.04239	0.15309	18	0.42063	0.06895		65.202	0.26388	0.32343	0.45452	0.18297
70.003	0.71626	0.43008	0.33098	0.22841	0.43745	0.67273	0.78484	1.13972	0.10616	0.12723	0.22453	0.38614	0.25585	-0.03363	0.41139	0.02276	0.07274	17	0.37139	0.0753		69.929	0.35332	0.63942	0.5292	0.36026	0.59729	0.37027	0.80556	1.12422	0.56674	0.40752	0.07297	0.36182	0.1644	0.44842	0.09431	0.14611	-0.11675	0.18816	18	0.39518	0.06931		70.202	0.25234	0.46421	0.34676	0.22028
75.003	0.57192	0.39652	0.30257	0.22641	0.29552	0.66725	0.83357	1.07806	0.05295	0.15399	0.24511	0.37904	0.25228	-0.04086	0.44229	-0.03902	-0.01043	17	0.3416	0.0749		74.936	0.3736	0.65322	0.55845	0.39811	0.53065	0.42533	0.76912	1.02032	0.56414	0.34465	-0.01129	0.22734	0.1547	0.44855	-0.03231	0.13041	-0.08783	0.12292	18	0.36611	0.0694		75.203	0.26185	0.25886	0.31642	0.2472
80.003	0.47099	0.35142	0.32541	0.18364	0.33795	0.66709	0.75376	0.93541	0.05514	0.16557	0.20729	0.28029	0.23791	-0.02778	0.36748	-0.04925	0.02929	17	0.31127	0.06608		79.927	0.35919	0.56318	0.53998	0.35159	0.51653	0.27617	0.71177	0.9896	0.483	0.27284	0.04592	0.29231	0.11681	0.40741	-0.08459	0.09824	-0.10342	0.06401	18	0.32781	0.06673		80.202	0.31196	0.3483	0.22125	-0.00386
85.007	0.65577	0.37901	0.27589	0.17347	0.32756	0.64531	0.73807	0.90282	0.01513	0.09278	0.18397	0.18446	0.10346	-0.05434	0.29117	-0.05337	-0.02638	17	0.2844	0.0709		84.935	0.36459	0.55288	0.42263	0.33427	0.4511	0.22919	0.68088	0.90452	0.48098	0.30383	-0.02122	0.28207	0.13289	0.40121	-0.03624	0.11001	-0.09528	0.05902	18	0.30874	0.06155		85.201	0.21925	0.32027	0.25764	0.12711
90.015	0.4832	0.30366	0.2476	0.23036	0.33225	0.63471	0.68481	0.85638	0.00609	0.00526	0.10363	0.24072	0.19573	-0.01229	0.37245	-0.09966	-0.03584	17	0.26759	0.0663		89.951	0.37083	0.52598	0.40104	0.35217	0.45545	0.29697	0.6469	0.88923	0.44511	0.27341	0.09059	0.25675	0.07108	0.35765	-0.09264	0.08648	-0.08503	0.02364	18	0.29809	0.06018		90.209	0.2148	0.25596	0.21687	0.05301
95.024	0.46978	0.28007	0.26491	0.18012	0.29691	0.50759	0.63882	0.81427	0.01166	0.03301	0.15632	0.23603	0.19501	-0.02882	0.35512	-0.10346	-0.0476	17	0.25057	0.06096		94.959	0.35563	0.49372	0.37099	0.32106	0.4097	0.17131	0.58822	0.83707	0.39206	0.24221	0.03427	0.19844	0.06382	0.34343	-0.02395	0.05293	-0.07456	0.03381	18	0.26723	0.05585		95.202	0.07067	0.17783	0.20488	0.10686
100.003	0.55242	0.28705	0.17962	0.24006	0.30988	0.47619	0.64145	0.85469	-0.02414	0.06444	0.13414	0.20015	0.19935	-0.06326	0.23317	-0.0795	-0.05532	17	0.24414	0.06357		99.951	0.36524	0.46724	0.39457	0.24024	0.47264	0.08245	0.62422	0.79734	0.35166	0.23221	-0.04485	0.24631	0.0707	0.30564	-0.07209	0.05679	-0.11686	0.08876	18	0.25346	0.0581		100.202	0.10803	0.23156	0.21584	0.2246
105.002	0.46943	0.26763	0.22606	0.16973	0.26212	0.4702	0.60591	0.7952	-0.08182	0.06088	0.12512	0.20886	0.17065	-0.11426	0.2785	-0.10253	-0.06002	17	0.22069	0.06174		104.934	0.29379	0.49829	0.37351	0.26136	0.39388	0.08767	0.66892	0.71853	0.32348	0.25397	-0.04732	0.16633	0.0553	0.2905	-0.09824	0.03661	-0.19516	-0.06217	18	0.22329	0.06025		105.202	0.17838	0.1938	0.13609	0.10801
110.003	0.52207	0.20846	0.1519	0.12528	0.28139	0.42853	0.59751	0.75296	-0.03029	0.034	0.0852	0.25186	0.19344	-0.03616	0.18337	-0.11547	-0.08289	17	0.20889	0.05957		109.982	0.28863	0.42698	0.32229	0.28251	0.33474	0.07475	0.64217	0.69244	0.30782	0.24317	-0.04569	0.25643	0.04035	0.27857	-0.15597	0.05254	-0.11841	0.00552	18	0.21827	0.05552		110.202	0.07851	0.21376	0.27765	-0.05675
115.002	0.41928	0.2523	0.19978	0.08972	0.21779	0.45382	0.56705	0.72715	-0.09226	0.02209	0.10659	0.26624	0.13557	-0.09052	0.21054	-0.09726	-0.05031	17	0.19633	0.05784		114.946	0.24626	0.44265	0.1774	0.25979	0.32307	0.01557	0.64177	0.65857	0.29539	0.14476	-0.08421	0.17243	0.01668	0.30237	-0.18649	0.03561	-0.08312	0.05701	18	0.19086	0.05522		115.202	0.06621	0.16175	0.13119	0.03598
120.007	0.39055	0.20311	0.23833	0.16179	0.20583	0.4451	0.52614	0.60927	-0.07626	0.00665	0.0864	0.12512	0.06914	-0.11078	0.1203	-0.11042	-0.09038	17	0.1647	0.05372		119.942	0.25362	0.39257	0.10693	0.28074	0.27196	0.05978	0.57626	0.65186	0.30491	0.20426	-0.06387	0.20349	0.02227	0.26618	-0.16374	0.02793	-0.10473	-0.01801	18	0.1818	0.05235		120.201	0.06004	0.25571	0.26579	0.01541
125.015	0.41668	0.20137	0.16568	0.18231	0.22616	0.40995	0.50132	0.63512	-0.11074	-0.01348	0.07427	0.16071	0.1316	-0.11495	0.17607	-0.12782	-0.05201	17	0.16837	0.05393		124.942	0.29358	0.39231	0.14864	0.24325	0.24611	-0.01021	0.57273	0.60613	0.23578	0.1703	-0.09146	0.05508	0.04713	0.25939	-0.21618	0.01328	-0.10727	-0.06993	18	0.15493	0.05345		125.202	-0.02668	0.12368	0.18873	-0.00702
130.024	0.33046	0.11823	0.15092	0.05729	0.18214	0.36771	0.4627	0.59393	-0.154	-0.05347	0.07464	0.21309	0.02465	-0.14637	0.12017	-0.1191	-0.12816	17	0.12322	0.05324		129.949	0.25743	0.40847	0.19741	0.21115	0.29367	-0.00679	0.56542	0.63485	0.25604	0.17283	-0.10886	0.11905	0.03148	0.25302	-0.18747	0.0223	-0.1641	-0.04017	18	0.16198	0.05435		130.201	0.03944	0.15515	0.22892	-0.04664
135.005	0.3895	0.11791	0.18024	0.09768	0.23273	0.43419	0.51383	0.54242	-0.14637	0.01023	0.05507	0.12043	0.06314	-0.14624	0.11695	-0.13367	-0.12631	17	0.13657	0.05435		134.957	0.24891	0.37308	0.144	0.22248	0.31755	-0.06867	0.56293	0.59424	0.24389	0.16256	-0.10831	0.10519	0.02524	0.22699	-0.25928	-0.01243	-0.13618	0.02063	18	0.14793	0.05424		135.201	-0.05557	0.03388	0.30431	0.01359
140.003	0.27885	0.16349	0.18146	0.14486	0.2045	0.36576	0.50065	0.58335	-0.11766	-0.02309	0.01562	0.16321	0.04016	-0.11777	0.15288	-0.19006	-0.16777	17	0.12814	0.0539		139.965	0.26559	0.34084	0.16605	0.24433	0.26927	-0.12685	0.5678	0.55298	0.21626	0.17384	-0.18741	0.16083	0.00893	0.19198	-0.25773	-0.02117	-0.11756	-0.06798	18	0.13222	0.05532		140.202	0.02251	0.0015	0.29863	-0.01826
145.005	0.20273	0.0748	0.17319	0.12795	0.18776	0.35403	0.49921	0.46118	-0.10343	-0.04861	0.01306	0.2071	0.00802	-0.18066	0.06413	-0.12484	-0.11394	17	0.10598	0.04874		144.933	0.21837	0.35514	0.14012	0.20956	0.22587	-0.05773	0.52961	0.65582	0.19701	0.12922	-0.13184	0.14529	0.00098717	0.19681	-0.22398	-0.01031	-0.07977	-0.07939	18	0.13449	0.05339		145.202	-0.02949	0.0203	0.17457	0.01434
150.005	0.20101	0.11169	0.13169	0.10298	0.18139	0.36873	0.41759	0.48526	-0.11149	-0.01115	0.03476	0.13524	0.02132	-0.16643	0.08212	-0.15587	-0.08332	17	0.10268	0.04612		149.939	0.21167	0.31556	0.0836	0.16812	0.27834	-0.18179	0.54402	0.52724	0.20622	0.10016	-0.14628	0.10563	0.00875	0.15881	-0.22985	-0.01453	-0.12924	-0.05076	18	0.10865	0.05222		150.202	0.01528	0.04641	0.23823	-0.21303
155.007	0.15627	0.11059	0.16028	0.06477	0.16457	0.44543	0.39654	0.45953	-0.14493	-0.07897	0.0545	0.12012	0.01228	-0.12798	0.06202	-0.16012	-0.11275	17	0.09307	0.04761		154.937	0.18591	0.35722	0.09617	0.17014	0.25442	-0.07767	0.50941	0.53373	0.155	0.10662	-0.07773	0.05842	0.0157	0.1915	-0.20074	-0.01375	-0.11223	-0.12067	18	0.11286	0.04903		155.202	-0.04501	0.00166	0.21221	-0.2126
160.015	0.22927	0.12828	0.13158	0.13708	0.11797	0.32968	0.36529	0.43949	-0.16592	-0.09363	0.00892	0.07261	0.03355	-0.16058	0.0393	-0.13654	-0.11139	17	0.08029	0.0448		159.942	0.21115	0.30342	0.02455	0.20567	0.24495	-0.19841	0.5132	0.52378	0.15277	0.12024	-0.18526	0.03634	-0.00941	0.15569	-0.25546	-0.03831	-0.12743	-0.05731	18	0.09001	0.05285		160.201	-0.04668	0.10601	0.26565	-0.08472
165.023	0.18018	0.12012	0.09537	0.12765	0.16538	0.38587	0.41472	0.41014	-0.18467	-0.12249	0.00565	0.10106	-0.02425	-0.12102	0.04853	-0.15223	-0.11921	17	0.07828	0.04692		164.956	0.20355	0.28963	0.07342	0.17536	0.19811	-0.13908	0.47672	0.4471	0.10519	0.11542	-0.1919	0.07429	-0.00312	0.16872	-0.15433	-0.01146	-0.07662	-0.09143	18	0.0922	0.04529		165.202	-0.03762	0.03768	0.23899	-0.04854
170.03	0.16398	0.04506	0.08693	0.07113	0.14204	0.34334	0.42028	0.35547	-0.16986	-0.05015	0.01282	0.16305	0.02801	-0.09902	-0.00809	-0.12742	-0.13184	17	0.07328	0.0426		169.963	0.20631	0.28143	0.03151	0.18233	0.23924	-0.19877	0.47854	0.44344	0.15111	0.10505	-0.08057	0.02828	-0.02108	0.13401	-0.20191	-0.02014	-0.1201	-0.06235	18	0.08757	0.04642		170.202	-0.04201	-0.02621	0.19761	0.01506
175.008	0.34037	0.03587	0.0791	0.14858	0.15849	0.36681	0.33657	0.31017	-0.12592	-0.05634	0.000921854	0.14033	-0.05704	-0.1096	-0.0223	-0.12511	-0.11681	17	0.07671	0.0428		174.933	0.21015	0.22714	0.01032	0.1481	0.2597	-0.1672	0.51348	0.51063	0.12113	0.02548	-0.15987	0.06693	-0.02456	0.14421	-0.27535	-0.02453	-0.13305	-0.10975	18	0.07461	0.05146		175.2	-0.08411	0.02426	0.23903	-0.03681
180.004	0.14578	0.03758	0.05734	0.1141	0.12313	0.34134	0.35014	0.37914	-0.16539	-0.13696	0.00207	0.03934	-0.00232	-0.10276	-0.03936	-0.13042	-0.18573	17	0.04865	0.04322		179.94	0.1925	0.22597	-0.04935	0.15434	0.16591	-0.13394	0.50076	0.44578	0.07966	0.047	-0.10063	-0.00412	-0.01955	0.10941	-0.22212	-0.00936	-0.07139	-0.10397	18	0.06705	0.04519		180.201	-0.02392	-0.03502	0.06493	-0.16271
Note: Columns marked with an asterisk appear also in Figure 1 Panel B
Panel C Insets					Units = DF/F0
Peak sypHy signal		Measured at t~=15 sec in C (end of stimulation, image #9)
tagBFP	tagBFP+hasyn	tagBFP:E-domain	tagBFP:E-domain+hasyn			Shapiro-Wilk Normality test							Kruskal-Wallis ANOVA (07/04/2024 15:14:39)
0.96358	0.80028	0.82192	0.91211			Normality Test (19/08/2023 10:13:32)							Descriptive Statistics
0.74052	0.67555	1.07162	0.79869				DF	Statistic	p-value	Decision at level(5%)				N	Min	Q1	Median	Q3	Max
0.45868	0.72956	1.43969	1.11673			TKO	17	0.86383	0.01755	Reject normality			TKO	17	0.45868	0.76493	0.92492	1.21879	2.19548
0.754	0.85811	1.27107	1.12041			TKO + haSyn	19	0.90905	0.0711	Can't reject normality			TKO + haSyn	19	0.63154	0.80407	1.18711	1.41488	2.29156
1.50604	1.26053	1.30801	1.11624			TKO+E	11	0.98909	0.99638	Can't reject normality			TKO+E	11	0.82192	1.02905	1.12957	1.27107	1.43969
0.83195	1.69353	1.02905	1.77315			TKO+E+haSyn	11	0.9513	0.66055	Can't reject normality			TKO+E+haSyn	11	0.79869	1.11624	1.28335	1.59719	1.77315
0.95471	0.63154	1.19299	1.41492										Ranks
0.81692	0.84903	0.98352	1.59719											N	Mean Rank	Sum Rank
0.79817	0.93472	1.14928	1.63387										TKO	17	22.8823	389
1.2672	0.80407	1.12957	1.28335										TKO + haSyn	19	29.4211	559
1.17038	1.18711	1.12641	1.55479										TKO+E	11	32	352
0.92492	1.41488												TKO+E+haSyn	11	37.3636	411
0.7326	0.8182												Test Statistics
0.77585	1.31912													Chi-Square	DF	Prob>Chi-Square
1.11114	1.28914													5.23749	3	0.15521
1.67624	1.65493
2.19548	2.29156
	1.21419
	1.57122
Panel E
Synaptic enrichment of hasyn				Units=fraction -> X100 = %
sypHy	sypHy-E-domain			Shapiro Wilk Normality test							Mann-Whitney U-test
0.32858	0.90998			Normality Test (22/08/2022 14:41:21)							Mann-Whitney Test (22/08/2022 14:41:26)
0.60516	1.27461				DF	Statistic	p-value	Decision at level(5%)			Descriptive Statistics
0.41835	1.02418			sypHy	21	0.90037	0.03557	Reject normality				N	Min	Q1	Median	Q3	Max
0.40956	0.89863			sypHy-E-dom	20	0.93541	0.1961	Can't reject normality			sypHy	21	0.2886	0.33678	0.59096	0.72003	1.01951
0.70015	1.50445										sypHy-E	20	0.39961	0.48857	0.79751	0.92728	1.50445
0.42399	1.23023										Ranks
0.34497	0.46553											N	Mean Rank	Sum Rank
1.01951	0.79259										sypHy	21	16.3333	343
0.7399	0.45825										sypHy-E	20	25.9	518
0.78844	0.85242										Test Statistics
0.68414	0.93304											U	Z	Exact Prob>|U|	Asymp. Prob>|U|
0.29514	0.52587											112	-2.543	0.00991	0.01099
0.68943	0.80243
0.97768	0.47614
0.61883	0.42341
0.2886	0.76618
0.34778	0.89398
0.31601	0.61273
0.2901	0.39961
0.93783	0.65374
0.59096
[truncated: 25 more columns]
