# Supplementary material for: Synapsin E-domain is essential for α-synuclein function
Source: eLife. 2024 May 7;12:RP89687. doi: 10.7554/eLife.89687 (PMC11076041; doi:10.7554/eLife.89687)
Supplement: Figure 3—source data 1. [file elife-89687-fig3-data1.xlsx]

## Sheet: Figure 3
Panel c	SynIa vs SynIaScrE		Units = DF/F0
Normalized and background-subtracted sypHy fluorescence as a function of time (in seconds). Field stimulation of a duration of 15 sec at 20Hz starts at t=0 (image #6).
TKO + SynIa																					TKO + SynIa + hasyn																					TKO+SynIaScrE
Time	*	*	*	*	*	*	*	*	*	*	*	*	*			N total	Mean	SE of mean			Time	*	*	*	*	*	*	*	*	*	*	*	*	*	*			N total	Mean	SE of mean		Time
-23.239	-0.00314	-0.0082	-0.0384	5.32192e-05	0.07197	0.00306	-0.01614	-0.03992	-0.01712	0.02478	0.02485	-0.08718	-0.00279	0.04617	0.00101	15	-0.00273	0.0097			-23.239	0.02512	-0.0256	-0.000182102	-0.02163	-0.00584	-0.02342	0.00415	-0.08411	0.00613	0.03361	0.055	0.03472	-0.02577	0.01891	0.00404	-0.02699	16	-0.00199	0.0083		-23.239	0.04728	0.00722	0.03944	-0.02819	-0.00675	-0.0075	-0.00778
-19.993	-0.02026	0.02584	-0.01032	0.00884	0.00611	-0.02984	-0.00247	-0.0123	-0.00105	-0.00427	-0.05087	-0.04775	0.04257	0.00425	0.01332	15	-0.00521	0.00649			-19.993	-0.02509	0.01706	-0.02698	-0.00888	0.007	0.000128348	-0.0115	-0.06518	0.01182	-0.00422	0.03125	0.00714	-0.06675	-0.0037	0.0366	0.01511	16	-0.00539	0.00734		-19.993	0.07334	0.00995	0.00694	-0.00109	0.01784	-0.01018	-0.01724
-15	0.00623	-0.01175	0.00744	-0.03369	0.00315	0.01601	0.0169	0.01073	0.03238	0.01445	0.0235	0.08817	0.02008	-0.02682	0.007	15	0.01159	0.00716			-15	0.02076	-0.10573	-0.0048	0.04908	-0.06649	0.02289	0.01289	0.02814	-0.0671	-0.04445	-0.03057	-0.04767	-0.09226	-0.10069	0.01856	0.03559	16	-0.02324	0.01311		-15	-0.01078	-0.00886	-0.00617	0.04391	-0.03026	-0.00339	-0.00564
-10	0.00342	0.01732	0.000834546	0.04184	-0.02378	-0.02061	0.00398	0.02095	-0.01444	-7.52981e-05	0.0657	0.07101	-0.02672	-0.00789	-0.0103	15	0.00808	0.00786			-10	-0.01174	0.00564	0.01456	-0.00222	0.0701	0.01508	-0.01319	0.01939	0.01492	-0.000896281	-0.01475	0.00444	0.10521	0.09155	-0.01296	0.0096	16	0.01842	0.00931		-10	-0.0819	-0.02519	-0.0092	-0.015	0.01308	0.0242	-0.0228
-5	0.03095	0.0109	0.01939	0.02773	-0.01246	-0.01662	0.00227	-0.01866	0.000235583	-0.03489	-0.06318	-0.02426	-0.03314	-0.04949	0.000808153	15	-0.01069	0.00712			-5	0.03562	0.04513	0.04138	-0.02675	-0.02799	0.0206	0.03432	0.01412	0.03424	0.01595	-0.04093	0.00137	0.07956	-0.00607	-0.14844	-0.00373	16	0.00427	0.01284		-5	-0.02795	0.01689	-0.03101	0.000370632	0.0061	-0.00312	0.05345
0	-0.0172	-0.03411	0.02105	-0.04477	-0.04499	0.048	-0.00454	0.0392	-0.01947	-0.03192	0.0114	0.03062	-0.06103	0.05008	0.06844	15	0.000715827	0.0105			0	-0.04467	0.0635	-0.02398	0.01039	0.02321	-0.03527	-0.02667	0.08764	-0.01662	-0.02788	-0.03727	-0.04231	-0.00242	-0.09205	-0.09731	-0.03509	16	-0.01855	0.01204		0	-0.03519	-0.04826	-0.02574	-0.01775	0.03661	-0.05798	0.02071
5.212	0.26638	0.69692	0.30662	0.61008	0.3203	0.55469	0.71148	0.56773	0.51731	0.5818	0.86093	0.71213	0.3712	0.38144	0.61346	15	0.53816	0.04532			5.212	0.11671	0.27537	0.20826	0.26991	0.4409	0.52263	0.32566	0.54105	0.30092	0.43607	0.37149	0.40057	0.35705	0.25235	0.25689	0.44293	16	0.34492	0.02894		5.212	0.49138	0.68682	0.42051	0.70459	0.3422	0.41233	0.5487
10.202	0.48524	1.27111	0.54441	1.15371	0.65872	0.91162	1.24573	1.1641	0.81705	0.91189	1.45577	0.7365	0.6614	0.68876	1.11431	15	0.92136	0.07658			10.202	0.23505	0.50871	0.39798	0.54445	0.80448	0.89856	0.53235	0.8425	0.49923	0.65794	0.61902	0.62946	0.64608	0.64863	0.38194	0.75395	16	0.60002	0.04426		10.202	0.73633	1.13138	0.78848	1.13768	0.59671	0.62204	0.97246
15.203	0.71544	1.55202	0.6725	1.60593	0.99861	1.25978	1.47724	1.64079	1.03361	1.19647	1.79982	1.12294	0.82034	0.95104	1.39713	15	1.21624	0.09133			15.203	0.32615	0.74386	0.40035	0.7529	1.13063	1.24996	0.68689	0.99416	0.67174	0.75009	0.73877	0.71821	0.8647	0.77383	0.63085	0.97118	16	0.77527	0.05896		15.203	0.93934	1.41184	0.83422	1.28662	0.75195	0.84223	1.20199
20.21	0.70084	1.56907	0.66763	1.69918	0.98141	1.14769	1.4479	1.6544	0.94602	1.12494	1.49299	1.00061	0.75239	0.81376	1.33282	15	1.15544	0.0918			20.21	0.24266	0.73269	0.43579	0.83073	1.14138	1.31014	0.66415	1.03464	0.5902	0.68198	0.61636	0.67703	0.61751	0.57753	0.71883	0.94426	16	0.73849	0.06632		20.21	0.8352	1.19575	0.71728	1.09934	0.73486	0.73785	1.0168
25.202	0.65603	1.48542	0.64467	1.62385	0.89124	1.06105	1.35679	1.50777	0.89134	0.9767	1.25447	1.02031	0.70346	0.87865	1.0942	15	1.06973	0.08125			25.202	0.16799	0.63105	0.33372	0.72319	1.03308	1.18208	0.61967	0.98733	0.48305	0.63561	0.42802	0.62338	0.5764	0.49945	0.69705	0.80139	16	0.6514	0.065		25.202	0.65929	1.1102	0.6039	0.93514	0.74432	0.63773	0.9118
30.203	0.61469	1.38369	0.58446	1.54288	0.86347	0.95856	1.25911	1.46404	0.78607	0.87387	1.1007	1.049	0.64222	0.6748	0.98509	15	0.98551	0.0808			30.203	0.25864	0.60108	0.3787	0.75735	1.02282	1.06461	0.57082	0.96413	0.45083	0.59895	0.29245	0.58451	0.56953	0.56754	0.57788	0.71061	16	0.62315	0.05922		30.203	0.63171	1.03125	0.50677	0.81544	0.61736	0.54981	0.81643
35.202	0.5401	1.32654	0.54554	1.43161	0.78215	0.91339	1.15057	1.31199	0.71314	0.66453	0.92079	0.77708	0.57745	0.62663	0.82435	15	0.87372	0.07704			35.202	0.30007	0.53155	0.25148	0.71805	1.04041	0.96122	0.5369	0.83548	0.37661	0.54098	0.30948	0.51574	0.46237	0.39217	0.54676	0.64577	16	0.56032	0.05776		35.202	0.63834	0.92959	0.42799	0.60707	0.5319	0.55814	0.65501
40.202	0.53708	1.13901	0.4993	1.36737	0.76016	0.85609	1.0162	1.16343	0.64779	0.60459	0.81453	0.85072	0.58705	0.59451	0.66693	15	0.80698	0.06721			40.202	0.17537	0.44747	0.23752	0.71324	0.87869	0.84057	0.45859	0.82047	0.32478	0.53397	0.17651	0.52063	0.37882	0.4106	0.56688	0.55625	16	0.50252	0.05603		40.202	0.53808	0.83713	0.33723	0.49836	0.52643	0.47487	0.66285
45.226	0.47899	1.07453	0.4778	1.28856	0.67184	0.7803	0.87167	1.14347	0.60358	0.55241	0.75246	0.67131	0.46405	0.44226	0.56384	15	0.72247	0.06852			45.226	0.16797	0.51792	0.2537	0.60211	0.75207	0.7648	0.41588	0.75812	0.2645	0.48669	0.11353	0.47221	0.35528	0.47311	0.50833	0.5665	16	0.46704	0.05015		45.226	0.44481	0.73081	0.28071	0.49325	0.44839	0.45495	0.58232
50.202	0.46305	0.9901	0.4496	1.26344	0.6221	0.66379	0.78766	1.06961	0.55791	0.43164	0.68721	0.67055	0.53516	0.47404	0.52055	15	0.67909	0.06434			50.202	0.17326	0.46064	0.11296	0.61383	0.78836	0.71294	0.39835	0.77603	0.23806	0.45216	0.01953	0.4409	0.37484	0.46508	0.50454	0.41181	16	0.43396	0.05576		50.202	0.34681	0.66117	0.23495	0.49098	0.47319	0.3252	0.47988
55.202	0.46153	0.98521	0.40838	1.28766	0.54566	0.67882	0.77955	0.98638	0.46593	0.40437	0.60726	0.523	0.41023	0.41814	0.42525	15	0.62583	0.06968			55.202	0.09944	0.36575	0.17036	0.51344	0.67872	0.70053	0.40307	0.69268	0.21812	0.38062	0.06849	0.37608	0.18011	0.38534	0.50848	0.36868	16	0.38187	0.05045		55.202	0.36128	0.63131	0.23952	0.41263	0.46153	0.33909	0.47359
60.236	0.35624	0.78447	0.39753	1.25256	0.44872	0.56484	0.79449	0.94772	0.45277	0.30197	0.44868	0.71044	0.39081	0.41382	0.41126	15	0.57842	0.06886			60.236	0.13781	0.2831	0.16688	0.53201	0.70761	0.65086	0.42283	0.65043	0.15652	0.37258	0.00804	0.36968	0.23779	0.27582	0.53212	0.36032	16	0.36652	0.05133		60.236	0.35126	0.58465	0.20373	0.30362	0.42849	0.31437	0.3646
65.202	0.3831	0.79237	0.34046	1.13286	0.32885	0.60429	0.64485	0.88902	0.39321	0.29761	0.52025	0.53081	0.39058	0.24184	0.33788	15	0.52187	0.06507			65.202	0.05428	0.21589	0.16023	0.50153	0.6185	0.59653	0.36973	0.5202	0.12623	0.37264	0.01422	0.3571	0.1957	0.29277	0.47123	0.27912	16	0.32162	0.04672		65.202	0.34227	0.54641	0.18637	0.32073	0.39967	0.27137	0.47948
70.203	0.26804	0.72216	0.3293	1.12162	0.35994	0.52216	0.65347	0.84296	0.37031	0.17024	0.47334	0.567	0.32111	0.23853	0.33752	15	0.48651	0.06672			70.203	0.04757	0.25401	0.14809	0.48261	0.60752	0.50381	0.4228	0.55018	0.17757	0.28841	-0.11703	0.2846	0.19107	0.2407	0.28675	0.22596	16	0.28716	0.0476		70.203	0.30722	0.46242	0.14374	0.2806	0.40348	0.27548	0.39728
75.265	0.26427	0.73351	0.32856	1.02363	0.51975	0.51462	0.52275	0.83646	0.3314	0.20695	0.24101	0.38624	0.32731	0.19477	0.21863	15	0.44332	0.0646			75.265	0.0841	0.32994	0.14461	0.46521	0.50732	0.45913	0.38081	0.56049	0.07768	0.27442	-0.04403	0.25819	0.16521	0.24345	0.38346	0.23691	16	0.28293	0.04279		75.265	0.13957	0.46639	0.07919	0.1396	0.34314	0.2184	0.35129
80.21	0.32994	0.67528	0.29808	1.02386	0.46085	0.44207	0.54828	0.78919	0.26999	0.14868	0.27045	0.48798	0.26228	0.18759	0.17991	15	0.42496	0.06425			80.21	0.09047	0.39785	0.10381	0.3874	0.531	0.47209	0.32811	0.32522	0.10063	0.2722	-0.09845	0.26652	0.16836	0.19111	0.34241	0.15596	16	0.25217	0.0408		80.21	0.19787	0.44476	0.08514	0.17402	0.30578	0.24261	0.25998
85.202	0.28542	0.62807	0.28018	1.05809	0.43326	0.45476	0.46494	0.79686	0.24455	0.07423	0.20701	0.43677	0.28662	0.14119	0.18137	15	0.39822	0.06813			85.202	0.09237	0.15859	0.11284	0.41595	0.41645	0.4234	0.27608	0.39453	0.07523	0.25026	-0.15771	0.23423	0.06524	0.3143	0.29094	0.16412	16	0.22043	0.04027		85.202	0.14992	0.42848	0.05838	0.1352	0.22795	0.19083	0.32657
90.203	0.24497	0.54345	0.2968	0.96762	0.23064	0.44155	0.45097	0.71891	0.21574	0.06063	0.29838	0.36019	0.24591	0.19644	0.11063	15	0.35885	0.06159			90.203	0.02405	0.08133	0.12077	0.39444	0.49792	0.36962	0.24593	0.49091	0.06228	0.25448	-0.09206	0.23264	0.04367	0.20808	0.34637	0.08419	16	0.21029	0.04375		90.203	0.17385	0.41492	0.02266	0.13867	0.30363	0.18525	0.21347
95.201	0.1751	0.52272	0.27542	0.98697	0.31588	0.41533	0.42634	0.7108	0.20674	-0.00335	0.13426	0.40254	0.16729	0.16399	0.09722	15	0.33315	0.06674			95.201	0.1276	0.1509	0.03628	0.36247	0.41333	0.47379	0.31995	0.41679	0.02455	0.21546	-0.05726	0.20811	0.07025	0.19903	0.32814	0.11539	16	0.2128	0.03967		95.201	0.05189	0.39389	-0.0055	0.10543	0.24948	0.14016	0.1763
100.202	0.21411	0.5182	0.21179	0.92347	0.35235	0.3191	0.42195	0.65419	0.16686	0.01675	0.18438	0.32303	0.2012	0.07129	0.06451	15	0.30955	0.0626			100.202	0.12232	0.25218	-0.00774	0.39794	0.41353	0.39718	0.2858	0.36989	0.04297	0.24869	-0.17029	0.22852	0.07899	0.074	0.30179	0.15592	16	0.19948	0.04181		100.202	0.07816	0.37158	-0.06752	0.06003	0.22029	0.16047	0.186
105.201	0.1308	0.50274	0.21992	0.89762	0.34665	0.34422	0.33053	0.65697	0.15032	-0.00358	0.19406	0.27687	0.23243	0.06821	0.05068	15	0.29323	0.06218			105.201	0.06242	0.24372	0.06189	0.41061	0.38941	0.41726	0.2735	0.38384	0.05272	0.17917	-0.13886	0.17669	0.09858	0.14912	0.2314	0.12253	16	0.19462	0.03891		105.201	0.1231	0.2577	-0.03036	0.01778	0.15468	0.17015	0.18383
110.232	0.13936	0.4292	0.18509	0.91871	0.29086	0.28568	0.36232	0.6237	0.08006	-0.0578	0.12821	0.27826	0.16165	0.05561	0.0117	15	0.25951	0.06515			110.232	0.11824	0.2713	0.06296	0.34487	0.38305	0.41605	0.26025	0.37617	0.04441	0.18344	-0.21571	0.17307	0.12838	0.03929	0.05361	0.14179	16	0.17382	0.04129		110.232	-0.01277	0.14988	-0.05745	0.02424	0.16911	0.11673	0.10177
115.201	0.17543	0.43637	0.19159	0.86904	0.25859	0.33338	0.29556	0.60504	0.09391	-0.06398	0.2357	0.34004	0.17611	0.06332	0.02551	15	0.26904	0.06089			115.201	0.07769	0.19533	0.02267	0.33712	0.2867	0.40852	0.25158	0.32939	0.04518	0.15261	-0.16686	0.13475	0.07295	0.03415	0.14082	0.10307	16	0.1516	0.0365		115.201	0.07934	0.19663	-0.09076	0.06269	0.19587	0.15894	0.11963
120.202	0.13833	0.31877	0.15726	0.94976	0.29906	0.30616	0.30284	0.58999	0.10044	-0.08558	0.07385	0.30545	0.18061	0.06058	0.03472	15	0.24882	0.0653			120.202	0.06163	0.10393	0.07469	0.33664	0.30944	0.35016	0.30609	0.37589	-0.00706	0.15129	-0.18303	0.13868	0.01698	0.09754	0.15032	0.05845	16	0.14635	0.03849		120.202	-0.00269	0.23197	0.0551	-0.05274	0.1959	0.06164	0.12886
125.272	0.14921	0.33519	0.16262	0.88692	0.28131	0.25944	0.30938	0.59773	0.06939	-0.04197	0.05329	0.40991	0.15777	0.0543	-0.00183	15	0.24551	0.06356			125.272	0.0773	0.09232	0.05772	0.33673	0.33342	0.30245	0.222	0.23453	-0.03853	0.15118	-0.25495	0.13504	0.06324	0.06007	0.18812	0.07006	16	0.12692	0.03741		125.272	0.01231	0.2556	-0.03218	-0.07766	0.12549	0.07298	0.13721
130.269	0.09542	0.25907	0.16396	0.80062	0.11724	0.31498	0.24369	0.53451	0.06654	-0.10567	0.02575	0.19233	0.16067	-0.00242	-0.01913	15	0.18984	0.0594			130.269	-0.01021	0.19242	0.05175	0.32519	0.38253	0.35995	0.19808	0.29052	-0.02535	0.11631	-0.2553	0.11702	0.0798	0.06196	0.17286	0.00878	16	0.12914	0.0414		130.269	0.00332	0.24525	-0.1169	-0.04004	0.2893	0.03909	0.13512
135.201	0.08728	0.38993	0.10218	0.84974	0.1834	0.21106	0.26496	0.52392	0.02994	-0.11086	0.07818	0.28856	0.17779	-0.04949	-0.01239	15	0.20095	0.06348			135.201	0.05619	0.21082	0.08638	0.29419	0.25607	0.36745	0.15069	0.15853	-0.02561	0.13195	-0.19359	0.10108	0.07982	0.07837	0.11226	0.01406	16	0.11742	0.03295		135.201	-0.0818	0.21395	-0.10287	-0.05115	0.19824	0.06399	0.12255
140.201	0.08856	0.23723	0.072	0.7597	0.15498	0.2631	0.24081	0.52935	0.04786	-0.14163	0.0992	0.2179	0.13682	0.07192	-0.01757	15	0.18402	0.05665			140.201	0.10693	0.06728	0.02116	0.29273	0.23283	0.28479	0.19474	0.18778	-0.06633	0.14015	-0.24758	0.11075	-0.03006	-0.01461	0.20137	0.00131	16	0.0927	0.03608		140.201	0.0138	0.22993	-0.09241	-0.00122	0.1307	0.07242	0.11914
145.204	0.10897	0.25447	0.04477	0.77857	0.29841	0.25388	0.22165	0.48914	0.00825	-0.17872	0.04431	0.3151	0.08688	0.00394	-0.08686	15	0.17618	0.06208			145.204	0.10791	0.10985	0.02133	0.29556	0.2053	0.31586	0.17011	0.25876	-0.051	0.07471	-0.17156	0.07029	-0.02553	0.04123	0.10288	0.01695	16	0.09642	0.03268		145.204	-0.08397	0.18312	-0.17352	-0.00644	0.10508	0.06687	0.10241
150.201	0.09298	0.22621	0.03251	0.76082	0.10507	0.26678	0.19377	0.48984	-0.00914	-0.09754	0.06054	0.15908	0.11243	-0.07164	-0.05803	15	0.15091	0.05845			150.201	0.03909	0.19219	0.01452	0.22856	0.30807	0.26681	0.11716	0.16271	-0.12959	0.0598	-0.21048	0.04675	-0.01623	-0.01335	0.20522	0.00909	16	0.08002	0.03561		150.201	-0.08245	0.17344	-0.12497	-0.04038	0.21959	-0.01401	0.08802
155.201	0.0952	0.22054	0.03089	0.72992	0.18877	0.19801	0.18567	0.45519	0.04942	-0.14636	0.05859	0.25338	0.12791	0.00857	-0.0596	15	0.15974	0.05506			155.201	0.18588	0.0373	-0.000605037	0.25025	0.20819	0.29803	0.06282	0.18994	-0.07008	0.07363	-0.21795	0.05807	0.04105	0.02806	0.08716	-0.02822	16	0.07522	0.03242		155.201	-0.04793	0.15416	-0.13334	0.00777	0.06433	0.01487	0.10764
160.201	0.07822	0.19545	0.01567	0.78302	0.27631	0.24479	0.23926	0.47433	0.00594	-0.14864	0.08446	0.28556	0.04348	-0.0251	-0.0644	15	0.16589	0.06098			160.201	0.01234	-0.01321	-0.01203	0.21707	0.12099	0.23686	0.14701	0.27788	-0.11091	0.00973	-0.22667	0.00824	0.01648	-0.04828	0.03149	-0.00364	16	0.04146	0.03273		160.201	-0.12769	0.10815	-0.11542	-0.0547	0.08888	0.06878	0.0524
165.201	0.05721	0.26883	-0.01118	0.74724	0.16885	0.23818	0.23577	0.47312	0.00371	-0.15684	-0.01035	0.28106	0.11057	0.03104	-0.09212	15	0.15634	0.06006			165.201	-0.04581	0.12051	0.03014	0.22383	0.23027	0.20956	0.1941	0.23411	-0.08793	0.02916	-0.27561	0.01215	0.000605718	-0.14761	0.08098	-0.05518	16	0.04708	0.03751		165.201	-0.14832	0.12248	-0.14192	-0.11861	0.07791	-0.0031	0.0689
170.202	0.04338	0.17017	0.00541	0.72886	0.1692	0.14754	0.15338	0.39557	-0.03395	-0.1809	0.00515	0.19604	0.09491	-0.00849	-0.06241	15	0.12159	0.05589			170.202	0.07838	0.09843	-0.01348	0.23466	0.15591	0.23828	0.10942	0.20196	-0.10232	0.05518	-0.19835	0.0376	0.00535	0.04827	0.02202	-0.04912	16	0.05764	0.02967		170.202	-0.09499	0.07348	-0.13605	-0.06669	0.10476	-0.02793	0.04568
175.206	-0.000455791	0.25227	0.00246	0.71583	0.15966	0.14646	0.16709	0.37272	-0.00944	-0.18194	-0.01514	0.1354	0.07352	-0.01364	-0.03684	15	0.11786	0.05521			175.206	0.11528	0.03167	-0.08652	0.24481	0.08756	0.18024	0.11732	0.10444	-0.14583	-0.0214	-0.24533	-0.02743	0.00738	-0.1357	0.08971	-0.09243	16	0.01399	0.03299		175.206	-0.19357	0.12462	-0.11709	-0.08459	0.12092	0.06013	0.01024
180.201	0.03693	0.21982	0.02194	0.69477	0.12302	0.19312	0.12333	0.38557	-0.01724	-0.13813	0.04071	0.13961	0.03011	-0.02321	-0.08375	15	0.11644	0.05322			180.201	-0.0082	0.00995	0.03778	0.23212	0.17035	0.1511	0.06521	0.1599	-0.06627	-0.02286	-0.09495	-0.02301	0.00832	-0.08403	0.09939	-0.08702	16	0.03424	0.02561		180.201	-0.0955	0.10855	-0.11633	-0.08633	0.03594	0.03648	0.06408
Note: Column marked by an asterisk appear also in Figure 1 Panel F
Panel c	Insets		Units = DF/F0
Peak sypHy signal		Measured at t~=15 sec in C (end of stimulation, image #9)
SynIa	SynIa+hasyn		SynIaScrE	SynIaScrE+hasyn			Shapiro-Wilk									One-way ANOVA							Tukey's posthoc analysis
0.71544	0.32615		0.93934	1.09594			Normality Test (28/03/2022 17:35:01)										DF	Sum of Squares	Mean Square	F Value	Prob>F						MeanDiff	SEM	q Value	Prob	Alpha	Sig	LCL	UCL
1.55202	0.74386		1.41184	1.31052			NormalityTest									Model	3	1.93988	0.64663	7.42645	0.000349438		SynIa + haSyn SynIa				-0.44098	0.10605	5.88059	0.000738306	0.05	1	-0.72322	-0.15874
0.6725	0.40035		0.83422	1.89366			Shapiro-Wilk									Error	48	4.1794	0.08707				SynIa[scrE] SynIa				-0.14368	0.12046	1.68678	0.63435	0.05	0	-0.46429	0.17692
1.60593	0.7529		1.28662	1.31936						DF	Statistic	p-value	Decision at level(5%)			Total	51	6.11928					SynIa[scrE] SynIa + haSyn				0.2973	0.11895	3.5346	0.07278	0.05	0	-0.01927	0.61387
0.99861	1.13063		0.75195	0.63057			TKO + Ia			15	0.96206	0.7282	Can't reject normality										SynIa[scrE] + haSyn SynIa				0.00249	0.11713	0.03008	1	0.05	0	-0.30924	0.31423
1.25978	1.24996		0.84223	1.35654			TKO + Ia + haSyn			16	0.94813	0.4606	Can't reject normality										SynIa[scrE] + haSyn SynIa + haSyn				0.44347	0.11557	5.42647	0.002	0.05	1	0.13588	0.75106
1.47724	0.68689		1.20199	1.23582			TKO + Ia[scrE]			10	0.86901	0.09733	Can't reject normality										SynIa[scrE] + haSyn SynIa[scrE]				0.14617	0.12893	1.60338	0.67072	0.05	0	-0.19695	0.4893
1.64079	0.99416		1.37272	1.0321			TKO + Ia[scrE] + haSyn			11	0.95596	0.72054	Can't reject normality
1.03361	0.67174		1.24668	0.95412
1.19647	0.75009		0.83801	1.4321
1.79982	0.73877			1.14537
1.12294	0.71821
0.82034	0.8647
0.95104	0.77383
1.39713	0.63085
	0.97118
Panel d
Normalized densitometry SynIa vs SynIaScrE
untransfected		Ctl		EYFP		EYFP-Syn Ia		EYFP-Syn Ia(ScrE)			Two sample t-test EYFP-SynIa vs EYFP-SynIa(ScrE)
0		0		0		1		0					N	Mean	SD	SEM	Median
0		0.04518		0.01213		1		0.00504			EYFP-Syn Ia		4	1	0	0	1
0		0		0.04096		1		0.01237			EYFP-Syn Ia(ScrE)		4	0.00635	0.00519	0.0026	0.00651
0		0.00476		0.00485		1		0.00797				Difference	4	0.99366		0.0026	0.9935
												Overall	8	0.50317	0.53114	0.18779	0.50619
												t Statistic	DF	Prob>|t|
											Equal Variance Assumed	--	6	--
											Equal Variance NOT Assumed (Welch Correction)	--	--	--
Panel f			Units = DF/F0
sypHy vs sypHy:E-domain
Normalized and background-subtracted sypHy fluorescence as a function of time (in seconds). Field stimulation of a duration of 15 sec at 20Hz starts at t=0 (image #6).
TKO + sypHy																								TKO+sypHy+hasyn										In Figure 1 Panel B							TKO+sypHyE
Time																*	*	*	*	N total	Mean	SE of mean		Time										*	*	*	N total	Mean	SE of mean		Time
-24.794	-0.00186	-0.02221	-0.01397	0.02461	-0.04378	0.01205	0.00182	-0.01304		-0.00725	-0.01087	-0.0228	0.02054	0.01413	0.04273	0.0345	-0.04142	-0.02588	-0.02202	18	-0.00415	0.00584		-24.794	0.07653	0.04949	-0.00928	-0.01408	0.02511	-0.000402566	-0.00576	-0.19576	-0.02498	-0.01706	0.02371	-0.00612	12	-0.00822	0.01912		-23.667	0.03006	-0.01774	0.000544125	0.02349	-0.03489	-0.00301	0.00466	0.01853
-19.815	0.01736	0.01817	0.03325	0.02772	-0.0153	-0.01648	-0.04447	-0.01634	0.00117	0.04839	-0.01489	0.01901	0.01618	-0.01781	0.00549	-0.0417	0.03982	0.02175	-0.01456	19	0.00351	0.00606		-19.815	-0.06304	0.0344	-0.0214	-0.05499	0.04181	0.00205	-0.01527	0.06916	0.09185	0.00505	-0.0124	-0.02197	12	0.0046	0.01355		-19.998	-0.0016	0.051	-0.00538	-0.01106	-0.00767	-0.00382	-0.01018	-0.02512
-14.817	0.04829	-0.00935	0.02103	-0.02165	0.0117	0.05878	0.01464	-0.00269	-0.003	0.00544	0.04022	-0.02202	0.00677	0.01567	-0.0205	0.0116	-0.0185	-0.03116	0.03083	19	0.00716	0.00578		-14.817	0.00913	0.07749	0.01794	-0.03249	-0.03111	-0.03044	-0.01849	-0.12454	-0.04457	0.00118	-0.02021	-0.02897	12	-0.01876	0.01355		-15.011	0.02399	0.01047	-0.03695	0.01393	0.00369	-0.0033	0.00854	0.01714
-9.825	-0.000122141	0.01426	-0.04528	-0.02968	0.02494	0.00832	-0.03413	-0.08612	0.02338	-0.02108	-0.0054	0.00355	-0.04357	0.01094	0.00956	-0.02834	-0.000855612	0.01864	0.00709	19	-0.00915	0.00666		-9.825	0.04138	0.00412	0.04418	0.04443	-0.08853	0.06625	-0.02489	0.1179	-0.15636	0.00663	-0.02383	0.07611	12	0.00895	0.02172		-10.011	-0.00895	-0.02658	0.03207	0.02408	0.01827	-0.0096	-0.02551	-0.0323
-4.812	-0.00427	0.01831	0.00722	0.01169	0.02936	-0.0057	0.02189	0.11324	-0.03216	-0.0629	-0.03933	-0.00541	-0.01583	-0.00244	-0.03075	0.02394	0.02096	0.01665	-0.00134	19	0.00332	0.00831		-4.812	-0.02647	-0.07378	-0.03555	0.02195	0.03855	-0.03175	0.06455	0.15528	-0.10736	0.0042	0.03273	-0.01906	12	0.00194	0.01977		-5.011	-0.0435	-0.01715	0.00971	-0.05044	0.02059	0.01972	0.02248	0.02175
0.218	0.00704	-0.01919	-0.00226	-0.0127	-0.00692	-0.05696	0.03966	0.00495	0.01082	0.03739	0.03026	0.02767	0.0159	-0.02047	-0.00652	0.01648	-0.02703	-0.00521	-0.04372	19	-0.000568518	0.006		0.218	-0.03753	-0.09173	0.00411	0.03519	0.01419	-0.0057	-0.000151352	-0.02204	0.24142	-0.02653	-0.06927	0.04803	12	0.0075	0.02419		0	-0.07511	-0.02578	-0.10119	-0.03205	-0.000208965	0.0144	-0.00391	0.01891
5.331	0.23577	0.3319	0.33377	0.43728	0.39681	0.49121	0.33252	0.37409	0.12584	0.33971	0.35355	0.4705	0.33391	0.32388	0.37325	0.54619	0.42254	0.12417	0.34201	19	0.35205	0.02451		5.331	0.33027	0.36366	0.20958	0.23237	0.27636	0.41289	0.55543	0.51489	0.43696	0.32733	0.31839	0.37114	12	0.36244	0.03022		5.194	0.3134	0.38708	0.59181	0.98573	0.52562	0.25759	0.59438	0.53023
10.201	0.48952	0.62584	0.60317	0.85649	0.57472	0.88056	0.54584	0.83172	0.31977	0.57336	0.70062	0.74383	0.77562	0.71854	0.85237	0.82885	0.66322	0.34527	0.61822	19	0.66039	0.03768		10.201	0.69908	0.57906	0.43806	0.54685	0.56203	0.75767	0.94884	0.74271	0.76397	0.62981	0.53001	0.52334	12	0.64345	0.04115		10.189	0.65509	0.63039	1.088	1.65204	0.93761	0.43213	1.01649	0.78816
15.173	0.71066	0.83846	0.83587	1.0587	0.85663	1.13503	0.78122	1.00424	0.52096	0.79608	0.91568	0.92583	0.91311	0.91321	1.07802	0.96358	0.74052	0.45868	0.754	19	0.85266	0.03979		15.173	0.876	0.82906	0.63655	0.81523	0.70675	0.91411	0.92589	0.73819	0.9215	0.80028	0.67555	0.72956	12	0.79739	0.02888		15.189	0.86634	0.84319	1.38028	1.75904	1.15669	0.52608	1.17967	0.94806
20.199	0.76194	0.86933	0.81578	0.97326	0.72602	1.08724	0.63049	1.12583	0.53828	0.73357	0.81656	0.82985	0.84561	0.70048	0.88632	0.81607	0.69201	0.52555	0.82051	19	0.79972	0.03589		20.199	0.92589	0.85069	0.66166	0.6823	0.7254	0.92322	0.91682	0.81805	0.8649	0.80174	0.66211	0.65391	12	0.79056	0.03134		20.19	0.81045	0.78442	1.08739	1.60333	0.88581	0.50222	1.09125	0.83202
25.206	0.71437	0.84506	0.79749	0.84174	0.60203	0.92417	0.61931	1.02123	0.40493	0.53431	0.73685	0.74859	0.66649	0.55038	0.62564	0.70342	0.58422	0.50919	0.83564	19	0.69816	0.0357		25.206	0.83531	0.64346	0.61309	0.54893	0.58162	0.82244	0.75823	0.52253	0.79731	0.76611	0.46628	0.63713	12	0.66604	0.03634		25.189	0.65835	0.67679	0.88712	1.50879	0.71868	0.44174	0.97928	0.6962
30.144	0.59706	0.67708	0.68714	0.81238	0.45997	0.82555	0.56409	0.95323	0.38707	0.44109	0.56358	0.60861	0.49906	0.37344	0.4404	0.5453	0.47801	0.47032	0.69424	19	0.58303	0.03637		30.144	0.79151	0.64136	0.56292	0.44115	0.4137	0.68539	0.59185	0.43558	0.51721	0.71383	0.35384	0.57216	12	0.56004	0.03855		30.19	0.67037	0.61421	0.80627	1.42685	0.60924	0.37907	0.90983	0.58402
35.203	0.45371	0.55049	0.58956	0.62126	0.4345	0.68642	0.40011	0.77653	0.33813	0.40577	0.46138	0.46748	0.4193	0.29506	0.31118	0.4779	0.43355	0.42398	0.6943	19	0.48635	0.03057		35.203	0.72981	0.40599	0.48183	0.29837	0.37817	0.59765	0.44967	0.36674	0.41546	0.62006	0.34737	0.54455	12	0.46964	0.03724		35.191	0.46826	0.54476	0.67122	1.25734	0.52436	0.39162	0.85054	0.50145
40.201	0.52422	0.59023	0.58451	0.52076	0.28638	0.56838	0.43533	0.70675	0.28706	0.33625	0.39505	0.37497	0.32589	0.2368	0.20097	0.37463	0.33373	0.37022	0.57348	19	0.4224	0.03211		40.201	0.70318	0.38206	0.47333	0.32272	0.26833	0.53675	0.35912	0.22859	0.28664	0.58995	0.28105	0.45087	12	0.40688	0.04226		40.19	0.41655	0.49974	0.50784	1.24296	0.40225	0.31955	0.71469	0.44261
45.184	0.40158	0.46524	0.48934	0.49423	0.2849	0.4866	0.33957	0.61085	0.2357	0.2876	0.39489	0.44102	0.32275	0.15857	0.10329	0.29457	0.28035	0.34023	0.57755	19	0.36888	0.03086		45.184	0.65098	0.36399	0.41057	0.1974	0.26644	0.45834	0.29754	-0.15352	0.27605	0.55078	0.16561	0.4093	12	0.32446	0.05956		45.189	0.3934	0.48593	0.51808	1.03171	0.37649	0.31253	0.73001	0.38615
50.174	0.42731	0.42828	0.40896	0.43985	0.23272	0.4084	0.28219	0.63714	0.20198	0.24274	0.35548	0.36358	0.24906	0.08625	0.1141	0.20281	0.29156	0.31761	0.51861	19	0.32677	0.03159		50.174	0.5235	0.29031	0.37532	0.17018	0.2086	0.41002	0.30128	-0.13643	-0.07384	0.50621	0.18138	0.39055	12	0.26226	0.05973		50.19	0.32476	0.41252	0.45934	1.12936	0.30552	0.25333	0.66338	0.24758
55.196	0.39359	0.35775	0.44452	0.41157	0.23949	0.37853	0.27748	0.54268	0.17064	0.23201	0.28475	0.24573	0.2006	0.03674	0.0074	0.21276	0.1721	0.31122	0.49953	19	0.28521	0.03261		55.196	0.49739	0.22767	0.29442	0.11857	0.09304	0.23528	0.20674	0.10439	0.06911	0.46461	0.14784	0.38953	12	0.23738	0.04225		55.19	0.3292	0.39371	0.37055	0.8582	0.20399	0.24143	0.53928	0.28622
60.141	0.35638	0.32025	0.36924	0.35241	0.11383	0.30267	0.24195	0.48519	0.14688	0.19873	0.26591	0.14938	0.14224	0.04587	-0.01271	0.15091	0.19317	0.30081	0.33889	19	0.23484	0.02875		60.141	0.47722	0.20702	0.33754	0.08456	0.22499	0.22327	0.04599	0.08265	0.1768	0.456	0.17755	0.29986	12	0.23279	0.04002		60.191	0.26448	0.33062	0.36698	0.76477	0.24342	0.21867	0.47027	0.25407
65.196	0.38073	0.29697	0.35873	0.2553	0.13799	0.32742	0.21627	0.37402	0.14259	0.19967	0.21456	-0.01368	0.14679	0.03752	0.00145	0.05901	0.19424	0.2604	0.35778	19	0.20778	0.02892		65.196	0.45711	0.20143	0.24139	0.07439	0.06069	0.16587	0.13777	-0.21635	0.09064	0.38832	0.06855	0.37507	12	0.17041	0.05267		65.189	0.24096	0.30583	0.35691	0.79658	0.12422	0.19136	0.42365	0.22147
70.188	0.35115	0.28989	0.34609	0.25734	0.16415	0.28499	0.19576	0.38236	0.13953	0.15626	0.26386	0.01294	0.08681	0.06531	-0.01457	0.10616	0.12723	0.22453	0.38614	19	0.20136	0.02801		70.188	0.38206	0.14278	0.24056	0.06292	0.01966	0.16498	0.06787	0.02452	-0.03529	0.40752	0.07297	0.36182	12	0.15936	0.04436		70.189	0.1513	0.24428	0.32305	0.8031	0.10242	0.1855	0.39728	0.21396
75.161	0.26879	0.24432	0.25956	0.23137	0.11554	0.22979	0.13477	0.3085	0.10703	0.12685	0.2265	-0.02797	0.08811			0.05295	0.15399	0.24511	0.37904	17	0.18496	0.02489		75.161	0.42175	0.19644	0.19253	0.10769	0.04106	0.13409	0.08828	0.05362		0.34465	-0.01129	0.22734	11	0.16329	0.03963		75.191	0.10341	0.24066	0.24858	0.64123	0.11232	0.12829	0.43257	0.13802
80.188	0.20813	0.1927	0.27002	0.18021	0.21599	0.15667	0.14042	0.28954	0.10122	0.08205	0.15844	-0.05638	0.06491	0.02977	0.03031	0.05514	0.16557	0.20729	0.28029	19	0.14591	0.02158		80.188	0.34765	0.11668	0.16898	-0.01156	0.15292	0.0775	-0.04176	-0.12142	-0.01195	0.27284	0.04592	0.29231	12	0.10734	0.042		80.189	0.12429	0.18975	0.15819	0.66585	0.05923	0.13316	0.30447	0.16018
85.195	0.23598	0.14954	0.20597	0.1869	0.26694	0.14102	0.1653	0.33841	0.05153	0.08561	0.20553	-0.0665	0.02919			0.01513	0.09278	0.18397	0.18446	17	0.1454	0.0245		85.195	0.32757	0.09046	0.18099	-0.04661	0.08456	0.11566	-0.01985	0.04192		0.30383	-0.02122	0.28207	11	0.12176	0.04071		85.189	0.10998	0.19453	0.24902	0.75505	0.04471	0.1013	0.27938	0.10647
90.185	0.23416	0.21678	0.17372	0.18835	0.26261	0.14902	0.16892	0.33627	0.02583	0.08046	0.14723	-0.0616	0.05556	-0.0288	-0.10422	0.00609	0.00526	0.10363	0.24072	19	0.11579	0.02766		90.185	0.32707	0.08359	0.16593	0.04381	-0.09796	0.08424	-0.06459	-0.15027	-0.03293	0.27341	0.09059	0.25675	12	0.08164	0.04411		90.189	0.06357	0.17751	0.12809	0.51073	0.07961	0.09535	0.2909	0.08952
95.195	0.27488	0.18541	0.21903	0.20878	0.16261	0.16337	0.11756	0.12771	0.04578	0.05081	0.16379	-0.06372	-0.00885			0.01166	0.03301	0.15632	0.23603	17	0.1226	0.02319		95.195	0.30101	-0.00607	0.11506	-0.07576	0.10809	0.06223	-0.06873	0.12139		0.24221	0.03427	0.19844	11	0.09383	0.03656		95.19	0.0548	0.16551	0.12725	0.45312	0.01258	0.05231	0.28553	0.1105
100.187	0.22698	0.10834	0.1851	0.07046	0.18509	0.12812	0.09697	0.14209	0.07369	0.05398	0.16726	-0.07432	-0.02137	-0.0315	-0.06823	-0.02414	0.06444	0.13414	0.20015	19	0.08512	0.02135		100.187	0.31942	0.00619	0.1424	-0.01956	0.08709	0.01749	-0.07542	0.13618	0.07065	0.23221	-0.04485	0.24631	12	0.09318	0.03613		100.189	-0.00091551	0.11091	0.06985	0.33937	-0.03324	0.05623	0.2528	0.0218
105.151	0.1832	0.16299	0.17786	0.12113	0.19237	0.10342	0.05716	0.18677	0.04762	0.00997	0.12506	-0.10357	-0.00328			-0.08182	0.06088	0.12512	0.20886	17	0.09257	0.02309		105.151	0.31407	-0.00625	0.15274	-0.03674	-0.03111	0.05242	-0.09052	-0.04857		0.25397	-0.04732	0.16633	11	0.06173	0.04157		105.19	0.04759	0.10083	0.08354	0.31416	-0.0163	0.04908	0.27591	-0.00454
110.201	0.17972	0.01559	0.13101	0.07724	0.09973	0.08458	0.07349	0.20497	0.06564	0.05547	0.10447	-0.10108	-0.02988	-0.04158	-0.12675	-0.03029	0.034	0.0852	0.25186	19	0.05965	0.02246		110.201	0.32288	0.02975	0.10927	-0.08381	-0.00943	0.01345	-0.08771	0.05347	-0.18413	0.24317	-0.04569	0.25643	12	0.05147	0.04472		110.189	-0.03382	0.10413	0.07274	0.3129	-0.04296	0.03708	0.27311	0.03931
115.194	0.0789	0.11778	0.19248	0.10937	0.1232	0.05716	0.08635	0.16928	0.0868	0.03347	0.13429	-0.14378	-0.0293			-0.09226	0.02209	0.10659	0.26624	17	0.07757	0.02432		115.194	0.27619	-0.02115	0.09783	-0.05078	0.12581	0.01142	-0.07736	-0.04164		0.14476	-0.08421	0.17243	11	0.0503	0.03599		115.189	0.0252	0.04906	-0.00561	0.27323	-0.01039	0.01032	0.26866	0.00616
120.175	0.13928	0.11586	0.154	0.09208	0.0557	0.08239	0.05649	0.09335	0.08188	0.04101	0.12223	-0.13694	-0.02084	-0.06874	-0.13383	-0.07626	0.00665	0.0864	0.12512	19	0.04294	0.02066		120.175	0.24931	-0.00863	0.10942	-0.06993	0.0309	0.02346	-0.06402	-0.12205	-0.19861	0.20426	-0.06387	0.20349	12	0.02448	0.04074		120.191	0.01987	0.05152	0.08802	0.22748	-0.01558	0.01363	0.13023	-0.05514
125.193	0.13496	0.04543	0.12129	0.09201	0.16898	0.07909	0.0657	0.07967	0.01544	0.03687	0.12968	-0.08592	-0.04569			-0.11074	-0.01348	0.07427	0.16071	17	0.05578	0.0199		125.193	0.21837	-0.03152	0.06052	-0.12115	-0.06626	0.00886	-0.04119	-0.03842		0.1703	-0.09146	0.05508	11	0.01119	0.03215		125.189	0.08645	0.05841	0.00895	0.15548	-0.0619	-0.02104	0.16233	-0.09462
130.186	-0.00155	0.09902	0.10843	0.15839	0.06776	0.07956	0.05523	0.18437	0.03639	-0.01562	0.12794	-0.12471	-0.03403	-0.07305	-0.13896	-0.154	-0.05347	0.07464	0.21309	19	0.03208	0.02489		130.186	0.2133	-0.02428	0.08172	-0.09043	-0.10245	-0.04583	0.05053	-0.18775	-0.2509	0.17283	-0.10886	0.11905	12	-0.01442	0.04153		130.189	0.04966	0.07198	0.02001	0.17921	-0.04092	-0.01884	0.20263	0.03351
135.193	0.04204	0.03915	0.09714	0.14223	0.0935	0.03104	0.1206	0.10365	-0.04866	0.01747	0.07924	-0.12044	-0.08233			-0.14637	0.01023	0.05507	0.12043	17	0.03259	0.02093		135.193	0.20695	0.04657	0.06094	-0.0407	-0.09744	-0.04	-0.06219	-0.22312		0.16256	-0.10831	0.10519	11	0.000949947	0.03865		135.191	0.10501	0.01306	-0.06065	0.17579	-0.04726	-0.00391	0.12915	-0.07483
140.185	0.09894	0.00626	0.13532	0.1369	0.17296	0.07595	0.05814	0.15479	-0.09974	0.06495	0.11781	-0.17339	-0.07287	-0.0461	-0.20452	-0.11766	-0.02309	0.01562	0.16321	19	0.02439	0.02689		140.185	0.23548	-0.0993	0.11459	0.03046	-0.02814	-0.06208	-0.09551	-0.12547	-0.23744	0.17384	-0.18741	0.16083	12	-0.01001	0.04398		140.189	-0.01758	-0.01129	0.05095	0.10802	-0.04906	-0.0099	0.14023	-0.02918
145.193	0.05152	0.00473	0.11249	0.11566	0.1787	0.04676	0.13532	0.07271	-0.05387	0.04019	0.06259	-0.14588	-0.07557			-0.10343	-0.04861	0.01306	0.2071	17	0.03609	0.02394		145.193	0.11563	0.05985	0.04879	-0.0945	-0.07858	-0.03504	-0.03251	-0.03248		0.12922	-0.13184	0.14529	11	0.00853	0.02895		145.189	0.01223	0.01573	-0.08512	0.05864	-0.06273	-0.02513	0.12942	-0.01609
150.172	0.0054	0.08152	0.0956	0.08418	0.17245	-0.00312	0.11308	0.06325	-0.06758	-0.01855	0.08948	-0.15156	-0.0823	-0.0634	-0.15724	-0.11149	-0.01115	0.03476	0.13524	19	0.01098	0.02233		150.172	0.18857	0.01721	0.04403	-0.04585	-0.07217	-0.06033	-0.01049	-0.02652	-0.07722	0.10016	-0.14628	0.10563	12	0.0014	0.02726		150.195	-0.0186	0.0097	-0.05466	0.10313	-0.11363	-0.07941	0.13101	-0.000967639
155.193	0.10052	0.02282	0.05804	0.09135	0.17183	0.04673	0.04636	0.09476	-0.09365	0.0431	0.12613	-0.23453	-0.07968			-0.14493	-0.07897	0.0545	0.12012	17	0.02026	0.02648		155.193	0.18568	0.01789	0.09484	-0.18949	-0.11501	-0.09846	-0.1062	-0.03981		0.10662	-0.07773	0.05842	11	-0.01484	0.03489		155.189	-0.00208	-0.00228	-0.01164	0.03914	-0.0862	-0.05612	0.17889	-0.01709
160.2	0.10807	0.02089	0.01341	0.11188	0.11807	0.01497	0.04086	0.01498	-0.04895	-0.01256	0.05905	-0.1785	-0.08226	-0.04353	-0.12553	-0.16592	-0.09363	0.00892	0.07261	19	-0.0088	0.02047		160.2	0.19167	-0.03123	0.07284	-0.09792	0.00633	-0.06713	-0.16131	-0.06972	-0.11744	0.12024	-0.18526	0.03634	12	-0.02522	0.03306		160.189	-0.0704	-0.03001	-0.04081	0.03958	-0.05714	-0.01472	0.17106	-0.02226
165.192	0.08858	-0.00904	0.06183	0.0987	0.07207	0.01275	0.01898	-0.00556	-0.07534	-0.0525	0.104	-0.08543	-0.03359			-0.18467	-0.12249	0.00565	0.10106	17	-0.000294296	0.0205		165.192	0.23156	-0.00156	0.04016	-0.07069	-0.0385	-0.07155	-0.03112	-0.13264		0.11542	-0.1919	0.07429	11	-0.00696	0.03574		165.189	-0.0339	-0.04649	-0.00365	-0.03227	-0.10804	-0.05556	0.14529	-0.02817
170.184	0.07158	0.03037	0.00575	0.06898	0.13734	0.05039	0.01324	0.00698	-0.08043	0.01644	0.09321	-0.15184	-0.02237	-0.04938	-0.15859	-0.16986	-0.05015	0.01282	0.16305	19	-0.000656334	0.02144		170.184	0.2265	-0.10188	0.07789	-0.12768	-0.05358	-0.09363	-0.09564	-0.11698	0.03643	0.10505	-0.08057	0.02828	12	-0.01632	0.03198		170.189	-0.05074	-0.06602	-0.05942	-0.02634	-0.07179	-0.0245	0.14013	0.00816
175.192	0.00543	-0.00894	0.02005	0.10228	0.11581	0.000310915	0.04121	0.06992	-0.06686	-0.02212	0.08989	-0.14244	-0.09307			-0.12592	-0.05634	0.000921854	0.14033	17	0.00414	0.02024		175.192	0.17923	0.03366	0.09901	-0.16499	-0.00743	-0.10878	-0.04959	-0.02972		0.02548	-0.15987	0.06693	11	-0.01055	0.03233		175.188	-0.02713	-0.06884	-0.09193	-0.06171	-0.08584	-0.05116	0.08511	-0.03194
180.184	0.01938	0.00823	0.03453	0.05082	0.06069	0.02147	0.06111	0.03571	-0.06021	0.022	0.0866	-0.14517	-0.07163			-0.16539	-0.13696	0.00207	0.03934	17	-0.00808	0.01896		180.184	0.15644	-0.10869	0.03273	-0.11937	0.03359	-0.06699	-0.06415	-0.12845		0.047	-0.10063	-0.00412	11	-0.02933	0.02709		180.19	0.02412	-0.07448	-0.13588	-0.00617	-0.10127	-0.06	0.08786	-0.09629
Note: In two experiments the sampling frequency at the end of the experiment was halved, and consequently some data points are absent.
Note: Columns marked with an asterisk appear also in Figure 1 Panel B
Panel f	Insets		Units = DF/F0
Peak sypHy signal		Measured at t~=15 sec in C (end of stimulation, image #9)
sypHy	sypHy+hasyn		shpHy-E	sypHy-E+hasyn
0.71066	0.876		0.86634	0.7205		Shapiro-Wilk									One-way ANOVA							Tukey's posthoc analysis
0.83846	0.82906		0.84319	0.70779		Normality Test (08/02/2022 13:23:48)										DF	Sum of Squares	Mean Square	F Value	Prob>F						MeanDiff	SEM	q Value	Prob	Alpha	Sig	LCL	UCL
0.83587	0.63655		1.38028	0.52		NormalityTest									Model	3	1.79146	0.59715	13.591	7.14622e-07		SypHy + haSyn SypHy				-0.05526	0.07729	1.01119	0.89075	0.05	0	-0.25951	0.14898
1.0587	0.81523		1.75904	0.65357		Shapiro-Wilk									Error	60	2.63624	0.04394				SypHy-Edom SypHy				0.15232	0.07112	3.0288	0.15184	0.05	0	-0.03562	0.34027
0.85663	0.70675		1.15669	0.78619					DF	Statistic	p-value	Decision at level(5%)			Total	63	4.42769					SypHy-Edom SypHy + haSyn				0.20759	0.08005	3.66753	0.05629	0.05	0	-0.00394	0.41911
1.13503	0.91411		0.52608	0.54577		SypHy			19	0.95647	0.50502	Can't reject normality										SypHy-Edom + haSyn SypHy				-0.30312	0.06998	6.12575	0.000326708	0.05	1	-0.48804	-0.1182
0.78122	0.92589		1.17967	0.56068		SypHy + haSyn			12	0.93568	0.44421	Can't reject normality										SypHy-Edom + haSyn SypHy + haSyn				-0.24785	0.07903	4.43515	0.01375	0.05	1	-0.4567	-0.03901
1.00424	0.73819		0.94806	0.40692		SypHy-Edom			16	0.92764	0.22365	Can't reject normality										SypHy-Edom + haSyn SypHy-Edom				-0.45544	0.07301	8.82183	2.75543e-07	0.05	1	-0.64837	-0.26251
0.52096	0.9215		0.96324	0.35522		SypHy-Edom + haSyn			17	0.95193	0.48782	Can't reject normality
0.79608	0.80028		1.46205	0.29017
0.91568	0.67555		0.93842	0.67611
0.92583	0.72956		0.76941	0.36309
0.91311			0.76977	0.56949
0.91321			1.03041	0.36397
1.07802			0.73362	0.55531
0.96358			0.75341	0.37583
0.74052				0.89154
0.45868
0.754
[truncated: 32 more columns]
