# Supplementary material for: Synapsin E-domain is essential for α-synuclein function
Source: eLife. 2024 May 7;12:RP89687. doi: 10.7554/eLife.89687 (PMC11076041; doi:10.7554/eLife.89687)
Supplement: Figure 4—source data 1. — Full images of anti-vGlut1 immunofluorescence channels in WT and synapsin TKO neurons, containing the details shown in panel A (marked with white dashed square). [file elife-89687-fig4-data1.xlsx]

## Sheet: Figure 4
Panel C left		Fluorescence Intensity			Arbitrary units
WT vs TKO
WT	TKO		Shapiro-Wilk							U-test
1.45772	0.37347		Normality Test (24/10/2023 00:18:58)							Mann-Whitney Test (24/10/2023 00:19:19)
0.6922	0.45567		Shapiro-Wilk							Descriptive Statistics
0.53642	0.34034			DF	Statistic	p-value	Decision at level(5%)				N	Min	Q1	Median	Q3	Max
1.31365	0.67666		WT	12	0.96691	0.87584	Can't reject normality			WT	12	0.53642	0.88414	0.99603	1.12107	1.45772
1.00794	0.66048		TKO	9	0.83121	0.04607	Reject normality			TKO	9	0.34034	0.41457	0.62455	0.66275	0.67666
0.98424	0.66502									Ranks
1.00782	0.65739										N	Mean Rank	Sum Rank
1.11096	0.62455									WT	12	15.0833	181
0.90987	0.48177									TKO	9	5.55556	50
0.97917										Test Statistics
1.12444											U	Z	Asymp. Prob>|U|
0.87556											103	3.44674	0.000567384
Panel C right		Full-width at Half-max			Units=mm		*notice: the data shown here is shown also in panel E
							Statistical analysis taken from panel E
Panel E		Full-width at Half-max			Units=mm
WT	WT+hasyn	TKO	TKO+hasyn		Shapiro Wilk Normality test							ANOVAOneWay (26/11/2023 12:19:32)							Tukey's Posthoc ananlysis
0.53367	0.67475	1.01447	1.03495		Normality Test (26/11/2023 16:48:44)							Descriptive Statistics								MeanDiff	SEM	q Value	Prob	Alpha	Sig	LCL	UCL
0.62332	0.721	0.78837	0.94686			DF	Statistic	p-value	Decision at level(5%)				N Analysis	N Missing	Mean	Standard Deviation	SE of Mean		WT WT+hasyn	0.22449	0.03518	9.02459	4.48748e-08	0.05	1	0.13218	0.31679
0.63061	0.87094	0.77031	1.2324		WT	28	0.9637	0.42495	Can't reject normality			WT	28	14	0.73056	0.11034	0.02085		TKO WT	0.20061	0.04133	6.86455	3.44731e-05	0.05	1	0.09217	0.30905
0.68921	0.98553	0.87761	0.89964		WT	26	0.97112	0.65259	Can't reject normality			WT+hasyn	26	16	0.95505	0.15468	0.03034		TKO WT+hasyn	-0.02388	0.04188	0.80626	0.94069	0.05	0	-0.13376	0.08601
0.49539	1.1201	0.88774	1.12001		TKO	15	0.93602	0.33491	Can't reject normality			TKO	15	27	0.93117	0.10015	0.02586		TKO+hasyn WT	0.23013	0.04133	7.8745	1.96366e-06	0.05	1	0.12168	0.33857
0.5401	1.22955	0.85747	0.92013		TKO	15	0.97176	0.8832	Can't reject normality			TKO+hasyn	15	27	0.96069	0.13821	0.03568		TKO+hasyn WT+hasyn	0.00564	0.04188	0.19041	0.99912	0.05	0	-0.10425	0.11553
0.77419	0.66598	1.01066	0.72702									ANOVA							TKO TKO+hasyn	0.02952	0.04716	0.885	0.9235	0.05	0	-0.09424	0.15327
0.57358	0.86505	0.98713	0.71152									Overall ANOVA
0.67025	0.83237	0.78422	0.83022										DF	Sum of Squares	Mean Square	F Value	Prob>F
0.64429	0.97838	0.95881	0.98801									Model	3	0.90789	0.30263	18.1392	4.5093e-09
0.66792	0.80923	1.04087	0.91813									Error	80	1.33471	0.01668
0.76305	0.85874	1.07725	0.95581									Total	83	2.2426
0.85344	0.82594	0.91621	1.04227
0.79557	0.85713	0.96203	1.06474
0.81403	0.92356	1.03446	1.01859
0.74546	1.0238
0.76104	1.19532
0.8745	1.11615
0.84188	0.9415
0.79059	0.96727
0.76614	0.94075
0.85493	1.10165
0.92976	1.14105
0.7361	0.98803
0.82297	1.1283
0.75092	1.06919
0.72745
0.78537
Panel F left		Full-width at Half-max			Units=mm
SynIa	SynIa+hasyn	SynIb	SynIb+hasyn		Shapiro Wilk Normality test							Kruskal-Wallis ANOVA
					Normality Test (26/11/2023 17:03:28)							Kruskal-Wallis ANOVA (26/11/2023 22:54:11)
0.86055	0.8399	0.70222	0.99118			DF	Statistic	p-value	Decision at level(5%)			Descriptive Statistics
0.83402	0.79449	0.76291	0.80869		SynIa	23	0.91363	0.04874	Reject normality				N	Min	Q1	Median	Q3	Max
0.85901	0.91804	0.82854	0.90072		SynIa	28	0.96658	0.49245	Can't reject normality			SynIa	23	0.66896	0.70224	0.74213	0.77395	0.86055
0.74213	0.79911	0.7573	0.91479		SynIb	16	0.97259	0.87862	Can't reject normality			SynIa	28	0.70744	0.76363	0.84759	0.92112	1.06479
0.7314	0.84263	0.77058	0.87275		SynIb	15	0.97665	0.94147	Can't reject normality			SynIb	16	0.70222	0.77428	0.83008	0.90812	1.00938
0.76476	0.73071	0.85867	0.87664									SynIb	15	0.73238	0.84536	0.87275	0.90887	0.99118
0.75371	1.06479	0.96052	0.84536									Ranks
0.70181	0.91327	0.91145	0.87257										N	Mean Rank	Sum Rank
0.8346	0.97011	0.89332	0.95416									SynIa	23	20.6957	476
0.77272	0.87995	0.89813	0.84995									SynIa	28	48	1344
0.77395	1.03119	0.83163	0.85536									SynIb	16	47.0625	753
0.75018	0.94664	0.95929	0.90621									SynIb	15	55.3333	830
0.70774	0.87462	1.00938	0.73238									Test Statistics
0.70077	0.92215	0.82141	0.79602										Chi-Square	DF	Prob>Chi-Square
0.66896	0.85256	0.81003	0.90887										25.5716	3	1.17247e-05
0.78119	0.86436	0.78536										Dunn's Test
0.70224	0.9485												Mean Rank Diff	Z	Prob	Sig
0.71898	0.94353											SynIa "SynIa"	-27.3043	-4.07412	0.000277127	1
0.69551	0.77255											SynIa "SynIb"	-26.3668	-3.4009	0.00403	1
0.71432	0.8403											SynIa "SynIb"	-34.6377	-4.38239	7.04301e-05	1
0.76454	0.74405											SynIa "SynIb"	0.9375	0.12561	1	0
0.70666	0.75521											SynIa "SynIb"	-7.33333	-0.96236	1	0
0.68682	0.85398											SynIb "SynIb"	-8.27083	-0.96631	1	0
	0.8221
	0.72055
	0.76066
	0.70744
	0.75597
Panel F right		Full-width at Half-max			Units=mm
SynIIa	SynIIa+hasyn	SynIIb	SynIIb+hasyn		Shapiro Wilk Normality test							One-way ANOVA
0.75212	1.10043	0.74974	0.90569		Normality Test (26/11/2023 23:02:42)							ANOVAOneWay (26/11/2023 22:54:43)
0.6983	1.0277	0.8819	0.84883			DF	Statistic	p-value	Decision at level(5%)			Descriptive Statistics
0.75291	0.88677	0.85866	0.76787		SynIIa	11	0.93674	0.48302	Can't reject normality				N Analysis	N Missing	Mean	Standard Deviation	SE of Mean
0.82836	1.12519	0.82147	0.84155		SynIIa	11	0.92655	0.377	Can't reject normality			SynIIa	11	2	0.75018	0.06966	0.021
0.85787	0.94865	0.81047	0.88915		SynIIb	11	0.91914	0.31157	Can't reject normality			SynIIa	11	2	0.90585	0.13608	0.04103
0.79778	0.9531	0.74424	0.88645		SynIIb	9	0.92771	0.45984	Can't reject normality			SynIIb	11	2	0.77193	0.06256	0.01886
0.82572	0.74068	0.70009	0.81638									SynIIb	9	4	0.82769	0.06243	0.02081
0.65694	0.83999	0.71588	0.73284									Overall ANOVA
0.68077	0.80365	0.70353	0.76042										DF	Sum of Squares	Mean Square	F Value	Prob>F
0.72991	0.75388	0.76993										Model	3	0.15872	0.05291	6.6126	0.00105
0.67133	0.78427	0.73537										Error	38	0.30403	0.008
												Total	41	0.46275
												Fit Statistics
													R-Square	Coeff Var	Root MSE	Data Mean
													0.34299	0.10999	0.08945	0.81326
												Means Comparisons
												Tukey Test
													MeanDiff	SEM	q Value	Prob	Alpha	Sig	LCL	UCL
												SynIIa SynIIa	0.15566	0.03814	5.77184	0.00122	0.05	1	0.0532	0.25813
												SynIIb SynIIa	0.02175	0.03814	0.80651	0.94031	0.05	0	-0.08071	0.12421
												SynIIb SynIIa	-0.13391	0.03814	4.96533	0.00616	0.05	1	-0.23638	-0.03145
												SynIIb SynIIa	0.0775	0.0402	2.72624	0.23378	0.05	0	-0.0305	0.18551
												SynIIb SynIIa	-0.07816	0.0402	2.74941	0.22725	0.05	0	-0.18617	0.02985
												SynIIb SynIIb	0.05575	0.0402	1.96112	0.51522	0.05	0	-0.05225	0.16376
